# Supplementary material for: Association between fasting blood glucose levels and stroke events: a large-scale community-based cohort study from China
Source: PubMed Central journal article supplement — BMJ Open. 2021 Aug 18;11(8):e050234. doi: 10.1136/bmjopen-2021-050234 (PMC8375728; doi:10.1136/bmjopen-2021-050234), 2021-08-18
Supplement: bmjopen-2021-050234.draft_revisions.pdf [file bmjopen-2021-050234.draft_revisions.pdf]

# BMJ Open

BMJ Open is committed to open peer review. As part of this commitment we make the peer review history of every article we publish publicly available.

When an article is published we post the peer reviewers' comments and the authors' responses online. We also post the versions of the paper that were used during peer review. These are the versions that the peer review comments apply to.

The versions of the paper that follow are the versions that were submitted during the peer review process. They are not the versions of record or the final published versions. They should not be cited or distributed as the published version of this manuscript.

BMJ Open is an open access journal and the full, final, typeset and author-corrected version of record of the manuscript is available on our site with no access controls, subscription charges or pay-per-view fees (<http://bmjopen.bmj.com>).

If you have any questions on BMJ Open's open peer review process please email [info.bmjopen@bmj.com](mailto:info.bmjopen@bmj.com)

# BMJ Open

## Association between fasting blood glucose levels and stroke events: a large-scale community-based cohort study from China

|                               |                                                                                                                                                                                                                                                                                                                                                                                                                                                                                                           |
|-------------------------------|-----------------------------------------------------------------------------------------------------------------------------------------------------------------------------------------------------------------------------------------------------------------------------------------------------------------------------------------------------------------------------------------------------------------------------------------------------------------------------------------------------------|
| Journal:                      | <i>BMJ Open</i>                                                                                                                                                                                                                                                                                                                                                                                                                                                                                           |
| Manuscript ID                 | bmjopen-2021-050234                                                                                                                                                                                                                                                                                                                                                                                                                                                                                       |
| Article Type:                 | Original research                                                                                                                                                                                                                                                                                                                                                                                                                                                                                         |
| Date Submitted by the Author: | 15-Feb-2021                                                                                                                                                                                                                                                                                                                                                                                                                                                                                               |
| Complete List of Authors:     | Zhang, Ya; Soochow University Medical College, School of Public Health<br>Gu, Shujun; Changshu Center for Disease Control and Prevention<br>Wang, Cuicui; Soochow University Medical College<br>Liu, Dong; Soochow University Medical College<br>Zhang, Qiuyi; Changshu Center for Disease Control and Prevention<br>Yang, Man; Changshu Center for Disease Control and Prevention<br>Zhou, Zhengyuan; Changshu Center for Disease Control and Prevention<br>Zuo, Hui; Soochow University Medical College |
| Keywords:                     | Stroke < NEUROLOGY, DIABETES & ENDOCRINOLOGY, EPIDEMIOLOGY                                                                                                                                                                                                                                                                                                                                                                                                                                                |
|                               |                                                                                                                                                                                                                                                                                                                                                                                                                                                                                                           |

SCHOLARONE™  
Manuscripts

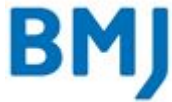

I, the Submitting Author has the right to grant and does grant on behalf of all authors of the Work (as defined in the below author licence), an exclusive licence and/or a non-exclusive licence for contributions from authors who are: i) UK Crown employees; ii) where BMJ has agreed a CC-BY licence shall apply, and/or iii) in accordance with the terms applicable for US Federal Government officers or employees acting as part of their official duties; on a worldwide, perpetual, irrevocable, royalty-free basis to BMJ Publishing Group Ltd ("BMJ") its licensees and where the relevant Journal is co-owned by BMJ to the co-owners of the Journal, to publish the Work in this journal and any other BMJ products and to exploit all rights, as set out in our [licence](#).

The Submitting Author accepts and understands that any supply made under these terms is made by BMJ to the Submitting Author unless you are acting as an employee on behalf of your employer or a postgraduate student of an affiliated institution which is paying any applicable article publishing charge ("APC") for Open Access articles. Where the Submitting Author wishes to make the Work available on an Open Access basis (and intends to pay the relevant APC), the terms of reuse of such Open Access shall be governed by a Creative Commons licence – details of these licences and which [Creative Commons](#) licence will apply to this Work are set out in our licence referred to above.

Other than as permitted in any relevant BMJ Author's Self Archiving Policies, I confirm this Work has not been accepted for publication elsewhere, is not being considered for publication elsewhere and does not duplicate material already published. I confirm all authors consent to publication of this Work and authorise the granting of this licence.

1  
2  
3 **Association between fasting blood glucose levels and stroke**  
4 **events: a large-scale community-based cohort study from China**  
5  
6  
7  
8  
9

10 Ya Zhang <sup>1,2,#</sup>, Shujun Gu <sup>3,#</sup>, Cuicui Wang <sup>1,2</sup>, Dong Liu <sup>1,2</sup>, Qiuyi Zhang <sup>3</sup>, Man  
11 Yang <sup>3</sup>, Zhengyuan Zhou <sup>3</sup>, Hui Zuo <sup>1,2,\*</sup>  
12  
13  
14

15  
16 <sup>a</sup> School of Public Health, Medical College of Soochow University, Suzhou 215123,  
17 China  
18

19  
20 <sup>b</sup> Jiangsu Key Laboratory of Preventive and Translational Medicine for Geriatric  
21 Diseases, Medical College of Soochow University, Suzhou 215123, China  
22

23  
24 <sup>c</sup> Changshu Center for Disease Control and Prevention, Suzhou 215123, China  
25

26 *# Ya Zhang and Shujun Gu contributed equally to this work.*  
27  
28

29  
30 **\* Corresponding Author:** Hui Zuo, School of Public Health, Medical College of  
31 Soochow University, Suzhou, China, 199 Ren'ai Rd., Suzhou 215123, China. Email:  
32 zuohui@suda.edu.cn.  
33  
34  
35  
36

37 **Running title:** Fasting blood glucose levels and stroke risk  
38  
39

40 **Word count:** 2721  
41

42 **Number of Tables:** 4  
43

44 **Number of Figures:** 1  
45  
46

47 **Disclosure of conflict of interest:** None  
48  
49  
50  
51  
52  
53  
54  
55  
56  
57  
58  
59  
60

## Abstract

**Objectives:** Diabetes mellitus has been associated with stroke. However, the association between fasting blood glucose (FBG) and stroke risk in general population remains still not clear. The purpose of our study was to examine the FBG levels on subsequent stroke risk in a community-based cohort in China.

**Design:** Prospective cohort study, employing Cox proportional hazard model to analyze the association of FBG levels with stroke risk.

**Setting:** A community-based cohort study included adults participating a baseline survey conducted in 2013 in Changshu, eastern China.

**Participants:** 16,113 participants were recruited with a multi-stage sampling method, excluding participants with severe disability, severe cancer, severe psychiatric disturbance, or previous stroke before enrolment.

**Primary and secondary outcome measures:** FBG levels and stroke events.

**Results:** During a median follow-up of 5.5 years, 417 incident cases of stroke were identified. The adjusted HR for total and ischemic stroke for participants in the fourth quartile of FBG compared with the first quartile was 1.45 (95% CI: 1.06, 1.97) and 1.56 (95% CI: 1.09, 2.23), respectively. The risk associations were consistent if classifications of FBG levels following the American Diabetes Association and WHO criteria were used. In stratified analyses, risk associations existed in women (HR: 1.93, 95% CI: 1.22, 3.05) and among postmenopausal women (HR: 1.68, 95% CI: 1.06-2.68) for the fourth quartile vs. the first. More importantly, the meta-analysis observed a positive association between FBG levels and stroke risk [pooled HR: 1.70, 95% CI: 1.28, 2.24; n=7)].

1  
2  
3  
4  
5 **Conclusions:** Higher FBG level was independently associated with an increased risk  
6 of stroke in Chinese adults, especially significant in women.  
7  
8  
9

10 **Keywords:** Stroke, Glucose, Risk, Cohort studies  
11  
12  
13  
14  
15  
16  
17  
18  
19  
20  
21  
22  
23  
24  
25  
26  
27  
28  
29  
30  
31  
32  
33  
34  
35  
36  
37  
38  
39  
40  
41  
42  
43  
44  
45  
46  
47  
48  
49  
50  
51  
52  
53  
54  
55  
56  
57  
58  
59  
60

For peer review only

### Strengths and limitations of this study

- Large sample size, measurement of plasma FBG, and complete follow-up.
- This study provides the first meta-analysis studying the association between FBG levels and stroke risk in a general population.
- No data available on HbA1c measurements in this study.

For peer review only

## Introduction

Stroke is one of the most important causes of human diseases and death<sup>1</sup>. According to the statistics of global disease burden in 2013, about 25.7 million stroke patients and 6.5 million stroke deaths worldwide<sup>2</sup>. There are 113 million disability-adjusted life years caused by stroke each year<sup>3</sup>. It poses a heavy psychological and economic burden to patients' families and society. Therefore, the primary prevention of stroke has now become a top priority for global public health. In China, it has become the leading cause of death<sup>4</sup> and one of the important reasons for disability in adults<sup>5</sup>.

Studies have shown that diabetes mellitus can increase the risk of stroke<sup>6,7</sup>. A cohort study involving 510,000 people observed that diabetes significantly increased the risk of ischemic stroke and hematencephalon<sup>7</sup>. A meta-analysis of 58,160 patients with type 2 diabetes in China revealed that intensive blood glucose treatment could not reduce the incidence of stroke compared with conventional treatment<sup>8</sup>. A prospective study showed that insulin resistance or diagnosed diabetes can predict the first stroke<sup>9</sup>. However, these studies focus on diabetes status instead of continuous glucose levels as the study exposure, which limits the generalizability of the research findings. Since fasting blood glucose (FBG) is the least interfered by diet<sup>10</sup>, the FBG levels are considered as a more reliable tool to measure blood glucose levels than random blood glucose levels<sup>11</sup>. FBG levels have a stronger predictive function for functional prognosis than random blood glucose levels. Although diabetes is closely related to cardiovascular disease (CVD), there is still insufficient data to support the evidence-based medicine proposal of strictly controlling FBG to prevent stroke.

Therefore, a further study focusing on the relationship between FBG levels and stroke is crucial, which can help us know whether people who are suffering from diabetes, impaired fasting glucose (IFG), insulin resistance, or other people with higher FBG levels should take prevention strategies against stroke. In this study, a community



1  
2  
3  
4 population from China was followed up for 5.5 years to study the relationship  
5  
6 between FBG levels and the incidence of stroke, aiming at providing suggestions and  
7  
8 a basis for primary prevention of stroke among people with different FBG levels.  
9  
10  
11  
12  
13  
14  
15  
16  
17  
18  
19  
20  
21  
22  
23  
24  
25  
26  
27  
28  
29  
30  
31  
32  
33  
34  
35  
36  
37  
38  
39  
40  
41  
42  
43  
44  
45  
46  
47  
48  
49  
50  
51  
52  
53  
54  
55  
56  
57  
58  
59  
60

For peer review only

## Methods

### Study population

The baseline survey of the current cohort study was conducted in 2013. The source population was 20,343 participants aged 35-74 years in rural communities in Changshu, eastern China who participated in an earlier study on metabolic syndrome in 2008, in addition to a small proportion of new participants. A multi-stage sampling method was used to recruit participants. Individuals with severe disability, severe cancer, or a severe psychiatric disturbance were excluded. Of these, 16,457 subjects in total were included in the baseline survey. We excluded 137 patients with a previous stroke before enrolment. Participants with missing data on baseline health information (n=207) were also excluded, leaving 16,113 participants in total for final analyses.

### Laboratory measurements

Blood samples were collected in the morning after overnight fasting and evaluated biochemical and clinical parameters on the same day. FBG was measured by an oxidase enzymatic method. The levels of high-density lipoprotein cholesterol (HDL-C), total cholesterol (TC), and triglyceride (TG) were assessed enzymatically using commercial reagents with an automatic biochemistry analyzer (Hitachi Inc, Tokyo, Japan).

### Follow-up and ascertainment of stroke

Follow-up began at the baseline and ended at the date of stroke diagnosis, death, or December 31, 2018, whichever came first. We classified total stroke into an ischemic stroke, and non-ischemic stroke (including hemorrhagic stroke, subarachnoid hemorrhage, and unexplained types of stroke). The primary outcome was

1  
2  
3  
4 hospitalization or death due to stroke collected by ICD-10 codes (total stroke: I60-I61,  
5 I63-I64; ischemic stroke: 63 except I63.9). If a participant had more than 1 stroke  
6 event during the follow-up, only the first stroke was considered.  
7  
8  
9

### 11 **Assessments of covariates**

12  
13  
14  
15 Demographic characteristics, lifestyle factors, personal medical history [CVD,  
16 hyperlipidemia, hypertension, diabetes, chronic obstructive pulmonary disease  
17 (COPD), nephropathy, and cancer], and family history data for all participants were  
18 obtained using standard questionnaires administered by trained staff. After the  
19 subjects rested for 5 minutes, the trained observers used an electronic  
20 sphygmomanometer (Omron Hp1300, OMRON Corporation, China) to measure the  
21 blood pressure in the sitting position three times every 30 seconds. The criteria for  
22 judging hypertension are a continuous measurement of systolic blood pressure  $\geq$   
23 140mmHg or diastolic blood pressure  $\geq$  90mmHg, diagnosis of hypertension, or  
24 antihypertensive medication. The body mass index (BMI) was calculated as weight in  
25 kilograms divided by the square of height in meters, among weight and height were  
26 measured by standard methods.  
27  
28  
29  
30  
31  
32  
33  
34  
35  
36  
37  
38  
39  
40  
41  
42  
43  
44  
45  
46  
47  
48  
49  
50  
51  
52  
53  
54  
55  
56  
57  
58  
59  
60

### 42 **Meta-analysis**

46 We conducted a meta-analysis combining the current study findings with previous  
47 observations on FBG and stroke risk. We searched the Medline and PubMed  
48 databases for related research articles published between January 01, 2000-September  
49 10, 2020 using the keywords “stroke”, “cardiovascular disease” and “fasting blood  
50 glucose”, “blood glucose”, “fasting glucose”, “fasting plasma glucose”, “glucose”, in  
51 addition to “prospective study”, “cohort study”, or “follow-up”. The study subjects  
52 were restricted to apparently healthy adults in the community. Two authors extracted  
53 the data independently, and if they had disagreements, discussed it with the third  
54  
55  
56  
57  
58  
59  
60

1  
2  
3  
4 author. Finally, seven studies were included<sup>12-17</sup>. We extracted information about  
5 authors, sample size, the country where the study was implemented, time of  
6 follow-up, adjusted covariates, outcome (stroke events), and the effect size [hazard  
7 ratio (HR)]. We used a random-effect model to calculate the pooled risk estimation  
8 based on the assumption of study heterogeneity. The Begg and Egger tests were  
9 performed to detect potential publication bias.<sup>18</sup>  
10  
11  
12  
13  
14  
15  
16

### 17 **Statistical analysis**

18  
19  
20  
21 Baseline demographic characteristics for continuous variables were expressed as  
22 median (interquartile ranges), and categorical variables were presented as  
23 percentages. Log-transformation was used to all laboratory measures to normalize  
24 distributions.  
25  
26  
27  
28  
29  
30

31 Cox proportional hazard analyses were conducted to evaluate FBG levels and risk of  
32 stroke and results presented as HR and 95% confidence intervals (CI). FBG levels  
33 were included in the models as a categorical measure (quartiles and three categories  
34 by clinical criteria). Multivariable models included conventional risk factors at  
35 baseline: age (continuous), sex, BMI (continuous), current smoking (yes/no), family  
36 history of stroke (yes/no), hypertension (yes/no), HDL-C (mmol/L), TC (mmol/L),  
37 TG (mmol/L) and use of statins. IFG is defined as an FBG of 6.1-6.9 mmol/L by  
38 WHO<sup>19</sup> and an FBG of 5.6-6.9 mmol/L by the American Diabetes Association  
39 (ADA)<sup>20</sup>. We also used clinical classification (normal FBG, IFG, hyperglycemia) to  
40 classify FBG levels. In addition, we conducted stratified analyses by sex to check  
41 potential effect modification. Sensitivity analyses were conducted to determine the  
42 robustness of the primary analysis results. We limited the risk-association analyses to  
43 participants who didn't report their own medical history, including hypertension,  
44 hyperlipidemia, cancer, nephropathy, CVD, or COPD at baseline.  
45  
46  
47  
48  
49  
50  
51  
52  
53  
54  
55  
56  
57  
58  
59  
60

Statistical analyses were conducted with R (version 4.0.2, [www.r-project.org](http://www.r-project.org)). All

1  
2  
3  
4 tests were 2-sided, and a P value less than 0.05 was considered statistically  
5  
6 significant.  
7  
8

9  
10 **Patient and public involvement**  
11

12  
13 Patients and the public were not involved this research.  
14  
15  
16  
17  
18  
19  
20  
21  
22  
23  
24  
25  
26  
27  
28  
29  
30  
31  
32  
33  
34  
35  
36  
37  
38  
39  
40  
41  
42  
43  
44  
45  
46  
47  
48  
49  
50  
51  
52  
53  
54  
55  
56  
57  
58  
59  
60

For peer review only

## Results

### Characteristics of the study population

After a median follow-up of 5.5 years (range: 0.1-5.7 years), a total of 417 (192 men and 225 women) stroke events were identified, of which 323 (77.5%) were ischemic stroke. Table 1 shows the baseline characteristics of participants across the quartiles of FBG. Compared with the participants in the study with lower FBG, those with higher FBG levels were more likely to suffer from obesity, hypertension, and hyperlipidemia, had higher levels of TC and TG in the blood, and preferred to have a family history of stroke ( $P<0.001$ , Table 1).

### FBG levels and risk of stroke

As shown in Table 2, we observed that higher FBG levels were significantly correlated with an increased risk of total and ischemic stroke in both the original models and models adjusted for age, sex, BMI, HDL-C, TC, TG, hypertension, smoking status, use of statins and family history of stroke. Compared to the lowest FBG quartile, the multivariable-adjusted HRs for the highest quartile were 1.45 (95% CI: 1.06-1.97,  $P=0.021$ ) for total and 1.56 (95%CI: 1.09-2.23,  $P=0.016$ ) for ischemic stroke. A positive association between FBG levels and non-ischemic stroke was observed in the crude model, but the risk association was rendered statistically nonsignificant in adjusted models. Further, we examined the association between clinical classifications of FBG levels and stroke risk, and the results are presented in Table 3. The multivariable-adjusted HR for total stroke was 1.68 (95%CI: 1.26-2.25,  $P=0.001$ ) and 1.60 (95% CI: 1.21-2.12,  $P=0.002$ ) for participants with hyperglycemia compared with those with normal blood glucose, following the ADA and WHO recommendations, respectively.

1  
2  
3  
4 Results of sex-stratified analyses are shown in Table 4. We observed a positive  
5 correlation between the FBG levels and total stroke in men in the unadjusted model,  
6 but not in adjusted models. In original models, higher levels of FBG were  
7 significantly associated with an increased risk of total stroke in women. After  
8 adjustment covariate for age, BMI, and other variates, the risk association remained  
9 significant (HR: 1.93, 95%CI: 1.22-3.05, P=0.004) for the fourth level in female  
10 groups. Similar risk estimates were found in postmenopausal or oophorectomy  
11 women. But no significant association with stroke was observed for FBG levels in  
12 premenopausal women (supplemental appendix S1).  
13  
14  
15  
16  
17  
18  
19  
20  
21  
22

23 In sensitivity analyses, the study population was restricted to 15,404 subjects without  
24 a self-reported history of hyperlipidemia, CVD, cancer, nephropathy, and COPD  
25 yielded essentially no change in risk of total stroke (HR: 1.38, 95% CI: 1.01, 1.92)  
26 and ischemic stroke (HR: 1.55, 95% CI: 1.06, 2.26). Additional eliminated for  
27 participants with hypertension, the association in women was slightly raised for total  
28 stroke (HR: 2.50, 95% CI: 1.11, 5.60) and ischemic stroke (HR: 2.59, 95% CI: 1.03,  
29 6.51) (data not shown).  
30  
31  
32  
33  
34  
35  
36  
37  
38

### 39 **Meta-analysis**

40  
41  
42 Figure 1 shows the results of meta-analysis including six previously published  
43 prospective studies together with our current study. In a word, higher FBG levels  
44 were associated with an increased risk of stroke (pooled HR: 1.70, 95% CI: 1.27-2.29).  
45 The Begg and Egger tests didn't suggest existence of potential publication bias (P>0.1  
46 for both tests).  
47  
48  
49  
50  
51  
52  
53  
54  
55  
56  
57  
58  
59  
60

## Discussion

### Principal findings

In our prospective community-based cohort, higher FBG levels were associated with an increased risk of total and ischemic stroke. The risk-association was prominent in women. After excluding the baseline of hypertension, hyperlipidemia, CVD, cancer, nephropathy, and COPD, these associations were still persisted in analyses of women. Our findings extend the previous knowledge on diabetes and stroke risk, suggesting an important role of routine glucose measurement in stroke prevention.

### Associations of FBG with stroke risk

When analyzing stroke subtypes, there is no evidence that FBG is associated with non-ischemic stroke, but the association with ischemic stroke persists. This is consistent with the results of a prospective cohort study among Korean men<sup>14</sup>. It suggests that the correlation between FBG and stroke is mainly contributed by an ischemic stroke. A large-scale prospective study in China (including 96,110 participants) indicated that both hyperglycemia and hypoglycemia are associated with an increased risk of incident intracerebral hemorrhage, after adjustment for potential confounders<sup>21</sup>.

Results based on the ADA and WHO criteria demonstrated that FBG levels of  $\geq 7.0$  mmol/L were a significant risk factor for stroke [HR (95% CI): 1.68 (1.26, 2.55) and 1.60 (1.21, 2.12) following the ADA and WHO criteria, respectively], whereas IFG was not. A large number of studies showed that people with diabetes are at increased risk of ischemic stroke<sup>22, 23</sup>. A meta-analysis including 698,782 participants reported that the risk of ischemic stroke in diabetic patients was 2.27 times higher than normal people<sup>22</sup>. A cohort study in Swedish also showed that poor blood glucose control in



1  
2  
3  
4 patients with type 2 diabetes was associated with an increased risk of stroke and  
5 death<sup>23</sup>. Although diabetes is associated with stroke, the influence of prediabetes on  
6 future stroke risk has not been clear yet. In a meta-analysis including 15 cohort  
7 studies, more than half of the studies showed that after adjusting for cardiovascular  
8 risk factors, there was no significant association between pre-diabetes and stroke<sup>24</sup>. A  
9 cohort study investigated the sex-specific associations of pre-diabetes with major  
10 clinical outcomes reached the same conclusion<sup>25</sup>. Our findings on IFG and stroke also  
11 resemble the previously reported results.  
12  
13  
14  
15  
16  
17  
18  
19  
20

21 Stratified analysis showed that the correlation between FBG levels and stroke risk  
22 only existed in women. According to the re-stratification of menopause, only  
23 postmenopausal women with the highest FBG level had a higher risk of stroke [HR  
24 (95% CI): 1.68 (1.06, 2.68)], no associations were found in premenopausal women. It  
25 probably due to the low number of stroke events in premenopausal women. Few  
26 published studies reported sex-stratified results. A sex-specific cohort study in the  
27 Middle East showed that only men with higher FBG levels showed an increased risk  
28 of stroke [HR: 2.15(1.26, 4.67) in FBG level of 6.1-6.9 mmol/L, HR: 2.38 (1.08, 5.25)  
29 in FBG level of >7.0 mmol/L]<sup>26</sup>. Korean Heart Study showed that IFG was associated  
30 with an increased risk of ischemic stroke in men but not in women<sup>27</sup>. We suspect that  
31 the disparities in sex between studies could be due to different definitions of outcome  
32 (all stroke vs. ischemic stroke) and the variety in covariate adjustments. A  
33 meta-analysis including 64 cohort studies provides the clearest evidence yet for the  
34 sex difference of diabetes and stroke risk. The excess risk of diabetes-related stroke in  
35 women is significantly higher than that in men and independent of sex-difference in  
36 other cardiovascular risk factors<sup>28</sup>. Our results support the findings of this  
37 meta-analysis, indicating that the association between FBG levels and stroke cases in  
38 women, and the mechanism may be related to the protective effect of estrogen.  
39  
40  
41  
42  
43  
44  
45  
46  
47  
48  
49  
50  
51  
52  
53  
54  
55  
56  
57

### 58 **Possible mechanisms**

59  
60

1  
2  
3  
4 Accumulating evidence suggests that FBG levels can be used to predict the risk of  
5 CVD<sup>15, 22, 29</sup>. As an adverse consequence of CVD, stroke is closely related to FBG  
6 levels<sup>30, 31</sup>. Its mechanism may be related to the dysfunction of cerebral  
7 microvasculature caused by hyperglycemia, insulin resistance, obesity, and  
8 hypertension<sup>32</sup>. The microvasculature is involved in the regulation of many brain  
9 processes. Once damaged, it's easy to cause cerebrovascular accidents<sup>33</sup>. The  
10 dysfunction is also obvious in the prediabetes population, which may suggest that IFG  
11 is the risk factor for stroke<sup>34</sup>. Besides, diabetic retinopathy was proved to be a sign of  
12 lacunar ischemic stroke, which had the same effects as cerebral microvascular  
13 dysfunction<sup>35</sup>.

14  
15  
16  
17  
18  
19  
20  
21  
22  
23  
24  
25 Compared with men, women with diabetes are at higher risk of stroke<sup>28</sup>. Previously, it  
26 was thought that the sex specificity of the severity of diabetes-related cardiovascular  
27 diseases was caused by the differences between men and women in treatment and  
28 chronic disease management. However, as the gradual equality of men and women,  
29 the risk of serious cardiovascular disease in postmenopausal women is still higher<sup>28</sup>.  
30 Sex hormones may explain the sex differences observed in human epidemiological  
31 studies<sup>36-38</sup>, indicating the estrogen protection in women, preventing the progression  
32 of non-diabetic cardiovascular diseases at least before menopause. Animal  
33 experiments show that the decrease of estrogen levels in ovariectomized mice can  
34 lead to impaired glycemia, reduced glucose tolerance, hyperinsulinemia, and impaired  
35 insulin secretion, and then develop into hyperglycemia and atherosclerosis<sup>39</sup>.  
36 However, diabetes seemingly attenuates the protective effect of estrogen on women in  
37 the development of CVD<sup>40</sup>.

## 38 39 40 41 42 43 44 45 46 47 48 49 50 51 52 **Strengths and Limitations**

53  
54  
55  
56 The main strengths of this study include the large sample size, measurement of  
57 plasma FBG, and the complete follow-up. We followed up the cases by recording  
58 linkages with hospital discharge diagnoses and the Cause of Death Registry. We used  
59  
60

1  
2  
3  
4 both quartiles and clinical classifications (normal FBG, IFG, hyperglycemia) to  
5 classify FBG levels, and obtained similar results. We considered different stroke  
6 subtypes as the study outcome. To our knowledge, this study provides the first  
7 meta-analysis investigating the association between FBG levels and stroke risk in the  
8 general population, therefore results are likely generalizable to all races.  
9  
10  
11  
12  
13  
14

15 Our study has several limitations. First, we do not have HbA<sub>1c</sub> measurements in this  
16 study. Among indicators to assess glucose variability, HbA<sub>1c</sub> is the gold standard for  
17 clinical evaluation of long-term blood glucose control<sup>9</sup>, while FBG may overlook the  
18 potential effects of postprandial blood glucose levels and other meaningful factors<sup>41</sup>.  
19  
20  
21  
22  
23 Second, the levels of estradiol and testosterone in the study subjects were not  
24 measured, although we speculated that the sex difference was probably due to the  
25 protective effect of sex hormone. Third, due to a low number of stroke cases, the real  
26 risk association of the premenopausal population may be biased.  
27  
28  
29  
30  
31  
32  
33  
34  
35  
36  
37  
38  
39  
40  
41  
42  
43  
44  
45  
46  
47  
48  
49  
50  
51  
52  
53  
54  
55  
56  
57  
58  
59  
60

## Conclusions

Our study indicates that higher FBG levels are associated with an increased stroke in the general population, and meta-analysis corroborated this finding. Further, we observed that the association was more prominent in women than in men. We also observed strong risk associations among postmenopausal or oophorectomy women. FBG levels as a routine and low-cost measurement could be used to identify individuals with higher stroke risk in the future.

## Contributors

Conceptualization, YZ and HZ; methodology, YZ; software, YZ; validation, YZ; formal analysis, YZ; resources, SG, QZ, MY and ZZ; data curation, YZ; visualization, YZ; investigation, YZ, CW and DL; writing—original draft preparation, YZ; writing—review and editing, YZ and HZ; supervision, HZ; project administration, HZ; funding acquisition, HZ. All authors have agreed on the journal to which the article has been submitted and agreed to be accountable for all aspects of the work. All authors read and approved the final manuscript.

## Funding

This work was supported by the National Natural Science Foundation of China [Nos. 81973122].

## Competing interests

None declared.

## Patient consent for publication

Not required.

## Ethics approval

The study protocol conforms to the ethical guidelines of the Declaration of Helsinki. The baseline survey and record linkages with study outcomes were approved by the

1  
2  
3  
4 Ethics Committee of Fuwai Cardiovascular Hospital, Beijing, China (No. 2012-399).  
5  
6 After a detailed explanation of our study, we obtained a written informed consent  
7  
8 form from each participant.  
9  
10

## 11 **Provenance and peer review**

12  
13  
14  
15

16 Not commissioned; externally peer reviewed.  
17  
18  
19

## 20 **Data availability statement**

21  
22  
23  
24

25 The datasets generated and/or analyzed during the current study are not publicly  
26 available due to the restrictions of containing information that could compromise the  
27  
28 privacy of research participants.  
29  
30  
31  
32  
33  
34  
35  
36  
37  
38  
39  
40  
41  
42  
43  
44  
45  
46  
47  
48  
49  
50  
51  
52  
53  
54  
55  
56  
57  
58  
59  
60

## References

1. Feigin V, Roth G, Naghavi M, et al. Global burden of stroke and risk factors in 188 countries, during 1990-2013: a systematic analysis for the Global Burden of Disease Study 2013. *The Lancet Neurology*. 2016;15(9):913-24.  
DOI: [10.1016/S1474-4422\(16\)30073-4](https://doi.org/10.1016/S1474-4422(16)30073-4)
2. Feigin VL, Norrving B, Mensah GA. Global Burden of Stroke. *Circulation Research*. 2017;120(3):439-48. DOI: [10.1161/CIRCRESAHA.116.308413](https://doi.org/10.1161/CIRCRESAHA.116.308413)
3. Feigin VL, Krishnamurthi RV, Parmar P, et al. Update on the Global Burden of Ischemic and Hemorrhagic Stroke in 1990-2013: The GBD 2013 Study. *Neuroepidemiology*. 2015;45(3):161-76. DOI: [10.1159/000441085](https://doi.org/10.1159/000441085)
4. Wang W, Jiang B, Sun H, et al. Prevalence, Incidence, and Mortality of Stroke in China: Results from a Nationwide Population-Based Survey of 480 687 Adults. *Circulation*. 2017;135(8):759-71. DOI: [10.1161/CIRCULATIONAHA.116.025250](https://doi.org/10.1161/CIRCULATIONAHA.116.025250)
5. Liu L, Wong L, Wang D, et al. Current status of endovascular procedures in management of ischemic stroke in China. *CNS Neurosci Ther*. 2014;20(6):483-4. DOI: [10.1111/cns.12281](https://doi.org/10.1111/cns.12281)
6. Banerjee C, Moon Y, Paik M, et al. Duration of diabetes and risk of ischemic stroke: the Northern Manhattan Study. *Stroke*. 2012;43(5):1212-7. DOI: [10.1161/STROKEAHA.111.641381](https://doi.org/10.1161/STROKEAHA.111.641381)
7. Bragg F, Li L, Yang L, et al. Risks and Population Burden of Cardiovascular Diseases Associated with Diabetes in China: A Prospective Study of 0.5 Million Adults. *PLoS Medicine*. 2016;13(7): e1002026. DOI: [10.1371/journal.pmed.1002026](https://doi.org/10.1371/journal.pmed.1002026)
8. Fang H, Zhou Y, Tian Y, et al. Effects of intensive glucose lowering in treatment of type 2 diabetes mellitus on cardiovascular outcomes: A meta-analysis of data from 58,160 patients in 13 randomized controlled trials. *Int J Cardiol*. 2016; 218:50-8. DOI: [10.1016/j.ijcard.2016.04.163](https://doi.org/10.1016/j.ijcard.2016.04.163)
9. Jia Z, Wu S, Zhou Y, et al. Metabolic syndrome and its components as predictors of stroke in middle-aged and elderly Chinese people. *Neurol Res*. 2011;33(5):453-9. DOI: [10.1179/016164111X13007856083882](https://doi.org/10.1179/016164111X13007856083882)

- 1  
2  
3  
4 10. Moebus S, Göres L, Lössch C, et al. Impact of time since last caloric intake on  
5 blood glucose levels. *Eur J Epidemiol.* 2011;26(9):719-28.  
6  
7 DOI: [10.1007/s10654-011-9608-z](https://doi.org/10.1007/s10654-011-9608-z)  
8  
9 11. Morris HJDC. Standards of Medical Care in Diabetes. *Diabetes Care.*  
10 2014;36(Suppl 1):S11-S66.  
11  
12 12. Nielson C, Fleming RMJA. Blood glucose and cerebrovascular disease in  
13 nondiabetic patients. *Angiology.* 2007;58(5):625-9.  
14  
15 DOI: [10.1177/0003319707303695](https://doi.org/10.1177/0003319707303695)  
16  
17 13. Boden-Albala B, Cammack S, et al. Diabetes, fasting glucose levels, and risk of  
18 ischemic stroke and vascular events: findings from the Northern Manhattan Study  
19 (NOMAS). *Circulation.* 2008;31(6):1132. DOI: [10.2337/dc07-0797](https://doi.org/10.2337/dc07-0797)  
20  
21 14. Sung J, Song YM, Ebrahim S, et al. Fasting blood glucose and the risk of stroke  
22 and myocardial infarction. *Circulation.* 2009;119(6):812-9.  
23  
24 DOI: [10.1161/CIRCULATIONAHA.108.776989](https://doi.org/10.1161/CIRCULATIONAHA.108.776989)  
25  
26 15. Liu F, Yang X, Li J, et al. Association of fasting glucose levels with incident  
27 atherosclerotic cardiovascular disease: An 8-year follow-up study in a Chinese  
28 population. *J Diabetes.* 2017;9(1):14-23. DOI: [10.1111/1753-0407.12380](https://doi.org/10.1111/1753-0407.12380)  
29  
30 16. Lee G, Kim SM, Choi S, et al. The effect of change in fasting glucose on the risk  
31 of myocardial infarction, stroke, and all-cause mortality: a nationwide cohort study.  
32 *Cardiovasc Diabetol.* 2018;17(1):51. DOI: [10.1186/s12933-018-0694-z](https://doi.org/10.1186/s12933-018-0694-z)  
33  
34 17. Peng X, Ge J, Wang C, et al. Longitudinal Average Glucose Levels and Variance  
35 and Risk of Stroke: A Chinese Cohort Study. *Int J Hypertens.* 2020; 2020:8953058.  
36  
37 DOI: [10.1155/2020/8953058](https://doi.org/10.1155/2020/8953058)  
38  
39 18. Begg CB, Mazumdar M. Operating characteristics of a rank correlation test for  
40 publication bias. *Biometrics.* 1994;50(4):1088-101.  
41  
42 19. WHO Guidelines Approved by the Guidelines Review Committee. Use of  
43 Glycated Haemoglobin (HbA1c) in the Diagnosis of Diabetes Mellitus: Abbreviated  
44 Report of a WHO Consultation. Geneva: World Health Organization Copyright ©  
45 World Health Organization, 2011.  
46  
47  
48  
49  
50  
51  
52  
53  
54  
55  
56  
57  
58  
59  
60



- 1  
2  
3  
4 20. Johnson EL, Feldman H, Butts A, et al. Standards of Medical Care in  
5 Diabetes—2020 Abridged for Primary Care Providers. *Clin Diabetes*. 2019;43(Suppl.  
6 1):S1-S212. DOI: [10.2337/cd20-as01](https://doi.org/10.2337/cd20-as01)  
7  
8  
9 21. Jin C, Li G, Rexrode KM, et al. Prospective Study of Fasting Blood Glucose and  
10 Intracerebral Hemorrhagic Risk. *Stroke*. 2018;49(1):27-33.  
11  
12 DOI: [10.1161/STROKEAHA.117.019189](https://doi.org/10.1161/STROKEAHA.117.019189)  
13  
14 22. Sarwar N, Gao P, Seshasai SR, et al. Diabetes mellitus, fasting blood glucose  
15 concentration, and risk of vascular disease: a collaborative meta-analysis of 102  
16 prospective studies. *Lancet*. 2010;375(9733):2215-22.  
17  
18 DOI: [10.1016/S0140-6736\(10\)60484-9](https://doi.org/10.1016/S0140-6736(10)60484-9)  
19  
20 23. Zabala A, Darsalia V, Holzmann MJ, et al. Risk of first stroke in people with type  
21 2 diabetes and its relation to glycaemic control: A nationwide observational study.  
22 *Diabetes, Obes and Metab*. 2019;22(2):182-90. DOI: [10.1111/dom.13885](https://doi.org/10.1111/dom.13885)  
23  
24 24. Lee M, Saver JL, Hong KS, et al. Effect of pre-diabetes on future risk of stroke:  
25 meta-analysis. *BMJ*. 2012; 344: e3564. DOI: [10.1136/bmj.e3564](https://doi.org/10.1136/bmj.e3564)  
26  
27 25. Shang Y, Fratiglioni L, Marseglia A, et al. Association of diabetes with stroke  
28 and post-stroke dementia: A population-based cohort study. *Alzheimers Dement*.  
29 2020;16(7):1003-12. DOI: [10.1002/alz.12101](https://doi.org/10.1002/alz.12101)  
30  
31 26. Parizadeh D, Rahimian N, Akbarpour S, et al. Sex-specific clinical outcomes of  
32 impaired glucose status: A long follow-up from the Tehran Lipid and Glucose Study.  
33 *Eur J Prev Cardiol*. 2019;26(10):1080-91. DOI: [10.1177/2047487319834396](https://doi.org/10.1177/2047487319834396)  
34  
35 27. Kim HK, Kim CH, Kim EH, et al. Impaired fasting glucose and risk of  
36 cardiovascular disease in Korean men and women: the Korean Heart Study. *Diabetes*  
37 *Care*. 2013;36(2):328-35. DOI: [10.2337/dc12-0587](https://doi.org/10.2337/dc12-0587)  
38  
39 28. Peters SA, Huxley RR, Woodward M. Diabetes as a risk factor for stroke in  
40 women compared with men: a systematic review and meta-analysis of 64 cohorts,  
41 including 775,385 individuals and 12,539 strokes. *Lancet*. 2014;383(9933):1973-80.  
42  
43 DOI: [10.1016/S0140-6736\(14\)60040-4](https://doi.org/10.1016/S0140-6736(14)60040-4)  
44  
45  
46  
47  
48  
49  
50  
51  
52  
53  
54  
55  
56  
57  
58  
59  
60

- 1  
2  
3  
4 29. Bragg F, Li L, Smith M, et al. Associations of blood glucose and prevalent  
5 diabetes with risk of cardiovascular disease in 500 000 adult Chinese: the China  
6 Kadoorie Biobank. *Diabetic Med.* 2014;31(5):540-51. DOI: [10.1111/dme.12392](https://doi.org/10.1111/dme.12392)  
7  
8  
9  
10 30. Luitse MJ, Biessels GJ, Rutten GE, et al. Diabetes, hyperglycaemia, and acute  
11 ischaemic stroke. *The Lancet Neurology.* 2012;11(3):261-71.  
12  
13 DOI: [10.1016/S1474-4422\(12\)70005-4](https://doi.org/10.1016/S1474-4422(12)70005-4)  
14  
15 31. Liu J, Rutten-Jacobs L, Liu M, et al. Causal Impact of Type 2 Diabetes Mellitus  
16 on Cerebral Small Vessel Disease: A Mendelian Randomization Analysis. *Stroke.*  
17 2018;49(6):1325-31. DOI: [10.1161/STROKEAHA.117.020536](https://doi.org/10.1161/STROKEAHA.117.020536)  
18  
19 32. Sloten TTV, Sedaghat S, Carnethon MR, et al. Cerebral microvascular  
20 complications of type 2 diabetes: stroke, cognitive dysfunction, and depression.  
21 *Lancet Diabetes Endocrinol.* 2020;8(4):325-336.  
22  
23 DOI: [10.1016/S2213-8587\(19\)30405-X](https://doi.org/10.1016/S2213-8587(19)30405-X)  
24  
25 33. Wardlaw JM, Smith C, Dichgans M. Small vessel disease: mechanisms and  
26 clinical implications. *The Lancet Neurology.* 2019;18(7):684-96.  
27  
28 DOI: [10.1016/S1474-4422\(19\)30079-1](https://doi.org/10.1016/S1474-4422(19)30079-1)  
29  
30 34. Stehouwer CDA. Microvascular dysfunction and hyperglycemia: a vicious cycle  
31 with widespread consequences. *Diabetes.* 2018;67(9):1729-41.  
32  
33 DOI: [10.2337/dbi17-0044](https://doi.org/10.2337/dbi17-0044)  
34  
35 35. Hankey GJ, Anderson NE, Ting RD, et al. Rates and predictors of risk of stroke  
36 and its subtypes in diabetes: a prospective observational study. *J Neurol Neurosur PS.*  
37 2013;84(3):281-7. DOI: [10.1136/jnnp-2012-303365](https://doi.org/10.1136/jnnp-2012-303365)  
38  
39 36. Brann DW, Dhandapani K, Wakade C, et al. Neurotrophic and neuroprotective  
40 actions of estrogen: basic mechanisms and clinical implications. *Steroids.*  
41 2007;72(5):381-405. DOI: [10.1016/j.steroids.2007.02.003](https://doi.org/10.1016/j.steroids.2007.02.003)  
42  
43 37. Howard VJ, Madsen TE, Kleindorfer DO, et al. Sex and Race Differences in the  
44 Association of Incident Ischemic Stroke With Risk Factors. *JAMA Neurol.*  
45 2019;76(2):179-86. DOI: [10.1001/jamaneurol.2018.3862](https://doi.org/10.1001/jamaneurol.2018.3862)  
46  
47  
48  
49  
50  
51  
52  
53  
54  
55  
56  
57  
58  
59  
60

- 1  
2  
3  
4 38. Reeves MJ, Bushnell CD, Howard G, et al. Sex differences in stroke:  
5 epidemiology, clinical presentation, medical care, and outcomes. *Lancet Neurol.*  
6 2008;7(10):915-26. DOI: [10.1016/S1474-4422\(08\)70193-5](https://doi.org/10.1016/S1474-4422(08)70193-5)  
7  
8  
9 39. Venegas-Pino DE, Wang PW, Stoute HK et al. Sex-Specific Differences in an  
10 ApoE(-/-):Ins2(+)/Akita) Mouse Model of Accelerated Atherosclerosis. *Am J Pathol.*  
11 2016;186(1):67-77. DOI: [10.1016/j.ajpath.2015.09.009](https://doi.org/10.1016/j.ajpath.2015.09.009)  
12  
13  
14 40. Kautzky-Willer A, Harreiter J, Pacini G. Sex and Gender Differences in Risk,  
15 Pathophysiology and Complications of Type 2 Diabetes Mellitus. *Endocr Rev.*  
16 2016;37(3):278-316. DOI: [10.1210/er.2015-1137](https://doi.org/10.1210/er.2015-1137)  
17  
18  
19 41. Jia Q, Zheng H, Zhao X et al. Abnormal glucose regulation in patients with acute  
20 stroke across China: prevalence and baseline patient characteristics. *Stroke.*  
21 2012;43(3):650-7. DOI: [10.1161/STROKEAHA.111.633784](https://doi.org/10.1161/STROKEAHA.111.633784)  
22  
23  
24  
25  
26  
27  
28  
29  
30  
31  
32  
33  
34  
35  
36  
37  
38  
39  
40  
41  
42  
43  
44  
45  
46  
47  
48  
49  
50  
51  
52  
53  
54  
55  
56  
57  
58  
59  
60

**Table 1.** Baseline characteristics of study population by FBG levels and stroke risk: Cohort Changshu.

| Characteristic                | Total             | Quartile of FBG Levels (mmol/L) |                          |                          |                       | P Value |
|-------------------------------|-------------------|---------------------------------|--------------------------|--------------------------|-----------------------|---------|
|                               | n=16,113          | Q1 (< 4.87)<br>n=4097           | Q2 (4.87-5.24)<br>n=4027 | Q3 (5.24-5.77)<br>n=3979 | Q4 (> 5.77)<br>n=4010 |         |
| Age, yrs                      | 55.7 (46.3, 64.4) | 48.6 (41.4, 59.1)               | 53.8 (44.8, 62.84)       | 57.8 (48.6, 65.9)        | 60.0 (51.4, 67.2)     | <0.001  |
| Men (%)                       | 40.9              | 42.1                            | 39.4                     | 40.2                     | 42.1                  | 0.002   |
| Premenopausal in women (%)    | 37.5              | 55.3                            | 42.3                     | 29.7                     | 22.3                  | <0.001  |
| Follow-up time, yrs           | 5.53 (5.49, 5.56) | 5.52 (5.49, 5.54)               | 5.52 (5.49, 5.55)        | 5.53 (5.50, 5.57)        | 5.55 (5.50, 5.58)     | <0.001  |
| BMI (kg/m <sup>2</sup> )      | 23.3 (21.2, 25.7) | 22.6 (20.6, 24.9)               | 23.0 (21.0, 25.3)        | 23.6 (21.5, 25.9)        | 24.2 (22.0, 26.5)     | <0.001  |
| Current smoking (%)           | 23.6              | 26.9                            | 23.5                     | 21.9                     | 21.9                  | <0.001  |
| Family history of stroke (%)  | 5.8               | 3.8                             | 5.4                      | 6.5                      | 7.6                   | <0.001  |
| Hypertension (%)              | 22.8              | 13.9                            | 18.6                     | 24.9                     | 34.0                  | <0.001  |
| Fasting blood glucose, mmol/L | 5.24 (4.87, 5.77) | 4.66 (4.47, 4.77)               | 5.06 (4.97, 5.15)        | 5.47 (5.34, 5.60)        | 6.37 (6.01, 7.20)     | <0.001  |
| TC, mmol/L                    | 4.70 (4.13, 5.36) | 4.48 (3.95, 5.04)               | 4.62 (4.08, 5.23)        | 4.79 (4.22, 5.44)        | 4.99 (4.36, 5.70)     | <0.001  |
| TG, mmol/L                    | 1.32 (0.96, 1.90) | 1.20 (0.88, 1.68)               | 1.26 (0.93, 1.78)        | 1.33 (0.97, 1.91)        | 1.52 (1.08, 2.30)     | <0.001  |
| HDL-C, mmol/L                 | 1.38 (1.14, 1.66) | 1.36 (1.14, 1.62)               | 1.37 (1.14, 1.64)        | 1.40 (1.15, 2.68)        | 1.38 (1.14, 1.69)     | <0.001  |
| Use of statins (%)            | 0.4               | 0.1                             | 0.3                      | 0.3                      | 0.7                   | <0.001  |

<sup>1</sup> BMI, body mass index; HDL-C, high density lipoprotein cholesterol; Q, quartile; TC, total cholesterol; TG, triglyceride.

<sup>2</sup> P Values were determined by Chi-square tests for categorical and Kruskal-Wallis tests for continuous variables.

**Table 2.** Hazard ratios (95% CI) for incident stroke by FBG quartiles

|                     |         | Quartile of FBG Levels |                   |                   |                   | P trend |
|---------------------|---------|------------------------|-------------------|-------------------|-------------------|---------|
|                     |         | Q1                     | Q2                | Q3                | Q4                |         |
|                     |         | HR (95%CI)             | HR (95%CI)        | HR (95%CI)        | HR (95%CI)        |         |
| Total stroke        | Cases/N | 57/4097                | 89/4027           | 110/3979          | 161/4010          |         |
|                     | Model 1 | 1 (Ref.)               | 1.60 (1.15, 2.22) | 2.00 (1.45, 2.75) | 2.92 (2.16, 3.94) | <0.001  |
|                     | Model 2 | 1 (Ref.)               | 1.21 (0.87, 1.69) | 1.17 (0.85, 1.62) | 1.46 (1.07, 1.98) | 0.018   |
|                     | Model 3 | 1 (Ref.)               | 1.20 (0.86, 1.68) | 1.16 (0.84, 1.60) | 1.45 (1.06, 1.97) | 0.021   |
| Ischemic stroke     | Cases/N | 42/4097                | 69/4027           | 83/3979           | 129/4010          |         |
|                     | Model 1 | 1 (Ref.)               | 1.68 (1.15, 2.47) | 2.05 (1.41, 2.96) | 3.17 (2.24, 4.49) | <0.001  |
|                     | Model 2 | 1 (Ref.)               | 1.27 (0.87, 1.87) | 1.19 (0.82, 1.73) | 1.58 (1.11, 2.25) | 0.013   |
|                     | Model 3 | 1 (Ref.)               | 1.25 (0.85, 1.84) | 1.17 (0.80, 1.71) | 1.56 (1.09, 2.23) | 0.016   |
| Non-ischemic stroke | Cases/N | 15/4097                | 20/4027           | 27/3979           | 32/4010           |         |
|                     | Model 1 | 1 (Ref.)               | 1.36 (0.70, 2.66) | 1.86 (0.99, 3.50) | 2.20 (1.19, 4.07) | 0.006   |
|                     | Model 2 | 1 (Ref.)               | 1.04 (0.53, 2.04) | 1.13 (0.60, 2.14) | 1.11 (0.59, 2.07) | 0.713   |
|                     | Model 3 | 1 (Ref.)               | 1.04 (0.53, 2.04) | 1.13 (0.60, 2.13) | 1.11 (0.69, 2.09) | 0.844   |

Model 1: unadjusted model; Model 2: adjusted for age, sex and BMI; Model 3: further adjusted for HDL-C, TC, TG, hypertension, smoking status, use of statins and family history of stroke.

**Table 3.** Hazard ratios (95% CI) for incident stroke by clinical classifications of FBG levels

|                   |                |            | Model 1           | Model 2           | Model 3           |
|-------------------|----------------|------------|-------------------|-------------------|-------------------|
| ADA<br>definition | <5.6 mmol/L    | Cases/N    |                   | 220/11079         |                   |
|                   |                | HR (95%CI) | 1 (Ref.)          | 1 (Ref.)          | 1 (Ref.)          |
|                   | 5.6–6.9 mmol/L | Cases/N    |                   | 136/3869          |                   |
|                   |                | HR (95%CI) | 1.78 (1.43, 2.20) | 1.16 (0.94, 1.44) | 1.18 (0.95, 1.47) |
|                   | ≥7.0 mmol/L    | Cases/N    |                   | 61/1165           |                   |
|                   |                | HR (95%CI) | 2.69 (2.02, 3.57) | 1.72 (1.29, 2.28) | 1.68 (1.26, 2.25) |
| P trend           |                |            | <0.001            | 0.001             | 0.001             |
| WHO<br>definition | <6.1 mmol/L    | Cases/N    |                   | 301/13422         |                   |
|                   |                | HR (95%CI) | 1 (Ref.)          | 1 (Ref.)          | 1 (Ref.)          |
|                   | 6.1–6.9 mmol/L | Cases/N    |                   | 55/1526           |                   |
|                   |                | HR (95%CI) | 1.61 (1.21, 2.15) | 1.08 (0.81, 1.45) | 1.09 (0.82, 1.46) |
|                   | ≥7.0 mmol/L    | Cases/N    |                   | 61/1165           |                   |
|                   |                | HR (95%CI) | 2.38 (1.81, 3.03) | 1.64 (1.24, 2.17) | 1.60 (1.21, 2.12) |
| P trend           |                |            | <0.001            | 0.001             | 0.002             |

ADA: American Diabetes Association; WHO: World Health Organization.

Model 1: unadjusted model; Model 2: adjusted for age, sex and BMI; Model 3: further adjusted for HDL-C, TC, TG, hypertension, smoking status, use of statins and family history of stroke.

**Table 4.** Hazard ratios (95% CI) for incident stroke by sex

|       |         | Quartile of FBG Levels |                   |                   |                   | P trend |
|-------|---------|------------------------|-------------------|-------------------|-------------------|---------|
|       |         | Q1                     | Q2                | Q3                | Q4                |         |
|       |         | HR (95% CI)            | HR (95% CI)       | HR (95% CI)       | HR (95% CI)       |         |
| Men   | Cases/N | 33/1725                | 42/1586           | 53/1599           | 64/1688           |         |
|       | Model 1 | 1 (Ref.)               | 1.40 (0.89, 2.20) | 1.74 (1.13, 2.69) | 1.99 (1.31, 3.03) | 0.001   |
|       | Model 2 | 1 (Ref.)               | 1.04 (0.66, 1.64) | 1.16 (0.75, 1.80) | 1.11 (0.73, 1.71) | 0.560   |
|       | Model 3 | 1 (Ref.)               | 1.04 (0.66, 1.65) | 1.15 (0.74, 1.79) | 1.06 (0.69, 1.64) | 0.741   |
| Women | Cases/N | 24/2372                | 47/2441           | 57/2380           | 97/2322           |         |
|       | Model 1 | 1 (Ref.)               | 1.91 (1.21, 3.29) | 2.38 (1.48, 3.84) | 4.19 (2.68, 6.55) | <0.001  |
|       | Model 2 | 1 (Ref.)               | 1.45 (0.89, 2.37) | 1.25 (0.78, 2.03) | 1.90 (1.21, 2.99) | 0.006   |
|       | Model 3 | 1 (Ref.)               | 1.43 (0.87, 2.34) | 1.26 (0.78, 2.05) | 1.93 (1.22, 3.05) | 0.004   |

Model 1: unadjusted model; Model 2: adjusted for age, sex and BMI; Model 3: further adjusted for HDL-C, TC, TG, hypertension, smoking status, use of statins and family history of stroke.

1  
2  
3  
4 **Figure 1.** Meta-analysis of fasting blood glucose at the highest vs lowest levels and  
5 the risk of developing stroke. The horizontal lines indicate the lower and upper limits  
6 of the 95% CI, and the grey squares reflects the HR of each study. HR: Hazard Ratio.  
7  
8  
9  
10  
11  
12  
13  
14  
15  
16  
17  
18  
19  
20  
21  
22  
23  
24  
25  
26  
27  
28  
29  
30  
31  
32  
33  
34  
35  
36  
37  
38  
39  
40  
41  
42  
43  
44  
45  
46  
47  
48  
49  
50  
51  
52  
53  
54  
55  
56  
57  
58  
59  
60

For peer review only



1  
2  
3  
4  
5  
6  
7  
8  
9  
10  
11  
12  
13  
14  
15  
16  
17  
18  
19  
20  
21  
22  
23  
24  
25  
26  
27  
28  
29  
30  
31  
32

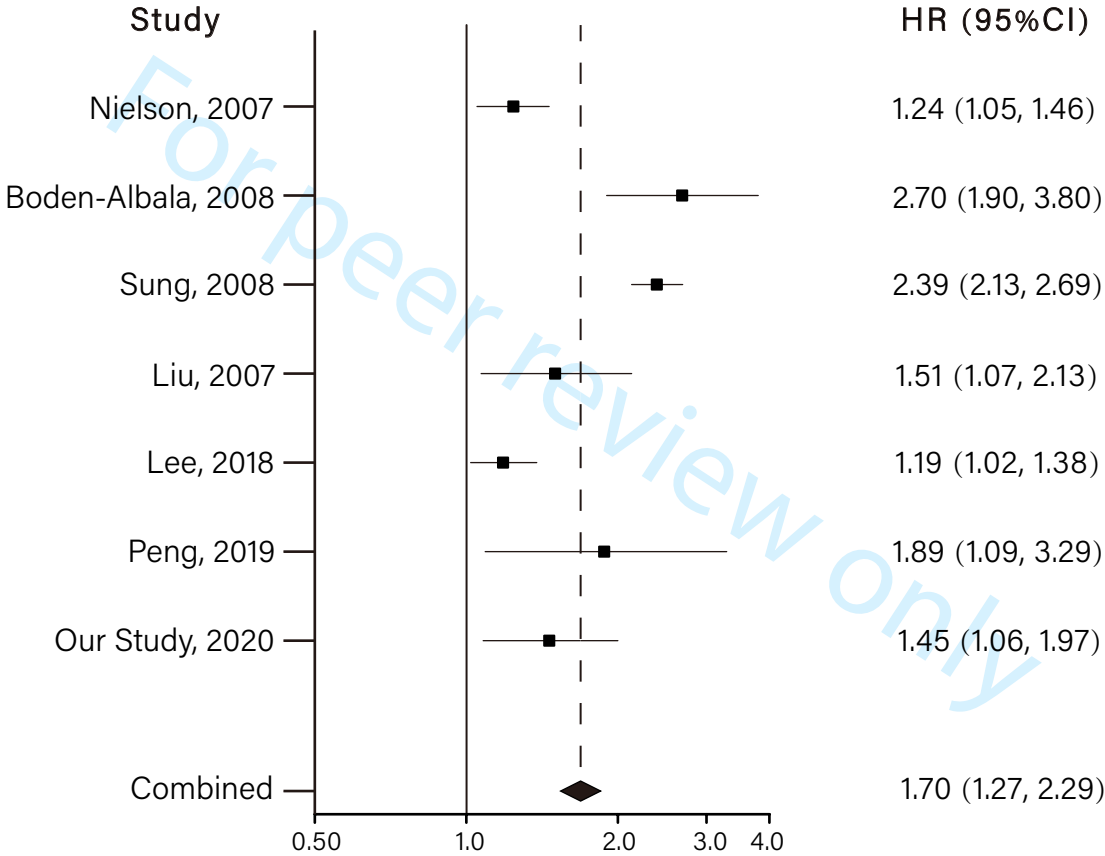

**Appendix S1.** Hazard ratios (95% CI) for incident stroke by menopausal status in women

|                                   |    |                    | Model 1            | Model 2            | Model 3            |
|-----------------------------------|----|--------------------|--------------------|--------------------|--------------------|
| Premenopausal                     | Q1 | Cases/N            |                    | 1/906              |                    |
|                                   |    | HR (95%CI)         | 1 (Ref.)           | 1 (Ref.)           | 1 (Ref.)           |
|                                   | Q2 | Cases/N            |                    | 5/896              |                    |
|                                   |    | HR (95%CI)         | 5.07 (0.59, 43.37) | 2.97 (0.34, 25.86) | 2.54 (0.29, 22.48) |
|                                   | Q3 | Cases/N            |                    | 7/883              |                    |
|                                   |    | HR (95%CI)         | 7.19 (0.89, 58.44) | 3.88 (0.47, 31.97) | 3.86 (0.47, 31.78) |
|                                   | Q4 | Cases/N            |                    | 8/884              |                    |
| HR (95%CI)                        |    | 8.18 (0.29, 22.48) | 1.90 (0.22, 16.15) | 1.80 (0.21, 15.30) |                    |
| P trend                           |    |                    | 0.013              | 0.850              | 0.916              |
| Postmenopausal or<br>oophorectomy | Q1 | Cases/N            |                    | 35/1489            |                    |
|                                   |    | HR (95%CI)         | 1 (Ref.)           | 1 (Ref.)           | 1 (Ref.)           |
|                                   | Q2 | Cases/N            |                    | 42/1513            |                    |
|                                   |    | HR (95%CI)         | 1.18 (0.76, 1.85)  | 1.05 (0.67, 1.64)  | 1.06 (0.62, 1.79)  |
|                                   | Q3 | Cases/N            |                    | 49/1473            |                    |
|                                   |    | HR (95%CI)         | 1.42 (0.92, 2.19)  | 1.07 (0.69, 1.66)  | 1.14 (0.70, 1.87)  |
|                                   | Q4 | Cases/N            |                    | 78/1471            |                    |
| HR (95%CI)                        |    | 2.28 (1.53, 3.40)  | 1.66 (1.11, 2.28)  | 1.68 (1.06, 2.68)  |                    |
| P trend                           |    |                    | <0.001             | 0.006              | 0.006              |

Model 1: unadjusted model; Model 2: Adjusted for age and BMI; Model 3: further adjusted for HDL-C, TC, TG, hypertension, use of statins and family history of stroke

# BMJ Open

## Association between fasting blood glucose levels and stroke events: a large-scale community-based cohort study from China

|                                 |                                                                                                                                                                                                                                                                                                                                                                                                                                                                                                           |
|---------------------------------|-----------------------------------------------------------------------------------------------------------------------------------------------------------------------------------------------------------------------------------------------------------------------------------------------------------------------------------------------------------------------------------------------------------------------------------------------------------------------------------------------------------|
| Journal:                        | <i>BMJ Open</i>                                                                                                                                                                                                                                                                                                                                                                                                                                                                                           |
| Manuscript ID                   | bmjopen-2021-050234.R1                                                                                                                                                                                                                                                                                                                                                                                                                                                                                    |
| Article Type:                   | Original research                                                                                                                                                                                                                                                                                                                                                                                                                                                                                         |
| Date Submitted by the Author:   | 13-Jul-2021                                                                                                                                                                                                                                                                                                                                                                                                                                                                                               |
| Complete List of Authors:       | Zhang, Ya; Soochow University Medical College, School of Public Health<br>Gu, Shujun; Changshu Center for Disease Control and Prevention<br>Wang, Cuicui; Soochow University Medical College<br>Liu, Dong; Soochow University Medical College<br>Zhang, Qiuyi; Changshu Center for Disease Control and Prevention<br>Yang, Man; Changshu Center for Disease Control and Prevention<br>Zhou, Zhengyuan; Changshu Center for Disease Control and Prevention<br>Zuo, Hui; Soochow University Medical College |
| <b>Primary Subject Heading</b>: | Public health                                                                                                                                                                                                                                                                                                                                                                                                                                                                                             |
| Secondary Subject Heading:      | Epidemiology                                                                                                                                                                                                                                                                                                                                                                                                                                                                                              |
| Keywords:                       | Stroke < NEUROLOGY, DIABETES & ENDOCRINOLOGY, EPIDEMIOLOGY                                                                                                                                                                                                                                                                                                                                                                                                                                                |
|                                 |                                                                                                                                                                                                                                                                                                                                                                                                                                                                                                           |

SCHOLARONE™  
Manuscripts



I, the Submitting Author has the right to grant and does grant on behalf of all authors of the Work (as defined in the below author licence), an exclusive licence and/or a non-exclusive licence for contributions from authors who are: i) UK Crown employees; ii) where BMJ has agreed a CC-BY licence shall apply, and/or iii) in accordance with the terms applicable for US Federal Government officers or employees acting as part of their official duties; on a worldwide, perpetual, irrevocable, royalty-free basis to BMJ Publishing Group Ltd ("BMJ") its licensees and where the relevant Journal is co-owned by BMJ to the co-owners of the Journal, to publish the Work in this journal and any other BMJ products and to exploit all rights, as set out in our [licence](#).

The Submitting Author accepts and understands that any supply made under these terms is made by BMJ to the Submitting Author unless you are acting as an employee on behalf of your employer or a postgraduate student of an affiliated institution which is paying any applicable article publishing charge ("APC") for Open Access articles. Where the Submitting Author wishes to make the Work available on an Open Access basis (and intends to pay the relevant APC), the terms of reuse of such Open Access shall be governed by a Creative Commons licence – details of these licences and which [Creative Commons](#) licence will apply to this Work are set out in our licence referred to above.

Other than as permitted in any relevant BMJ Author's Self Archiving Policies, I confirm this Work has not been accepted for publication elsewhere, is not being considered for publication elsewhere and does not duplicate material already published. I confirm all authors consent to publication of this Work and authorise the granting of this licence.

1  
2  
3  
4 **1 Association between fasting blood glucose levels and stroke**  
5 **2 events: a large-scale community-based cohort study from China**  
6  
7  
8  
9

10 Ya Zhang <sup>1,2,#</sup>, Shujun Gu <sup>3,#</sup>, Cuicui Wang <sup>1,2</sup>, Dong Liu <sup>1,2</sup>, Qiuyi Zhang <sup>3</sup>, Man  
11 Yang <sup>3</sup>, Zhengyuan Zhou <sup>3</sup>, Hui Zuo <sup>1,2,\*</sup>  
12  
13  
14

15  
16 <sup>a</sup> School of Public Health, Medical College of Soochow University, Suzhou 215123,  
17  
18 China  
19

20 <sup>b</sup> Jiangsu Key Laboratory of Preventive and Translational Medicine for Geriatric  
21  
22 Diseases, Medical College of Soochow University, Suzhou 215123, China  
23

24 <sup>c</sup> Changshu Center for Disease Control and Prevention, Suzhou 215123, China  
25

26 *# Ya Zhang and Shujun Gu contributed equally to this work.*  
27  
28

29  
30 **\* Corresponding Author:** Hui Zuo, School of Public Health, Medical College of  
31  
32 Soochow University, Suzhou, China, 199 Ren'ai Rd., Suzhou 215123, China. Email:  
33  
34 zuohui@suda.edu.cn.  
35  
36

37 **Running title:** Fasting blood glucose levels and stroke risk  
38  
39

40 **Word count:** 2753  
41

42 **Number of Tables:** 4  
43

44 **Number of Figures:** 1  
45  
46

47 **Disclosure of conflict of interest:** None  
48  
49  
50  
51  
52  
53  
54  
55  
56  
57  
58  
59  
60

1  
2  
3  
4 25 **Abstract**  
5  
6  
7 26

8  
9 27 **Objectives:** Diabetes mellitus has been associated with stroke. However, the  
10  
11 28 association between fasting blood glucose (FBG) and stroke risk in general population  
12  
13 29 remains still not clear. The purpose of our study was to examine the FBG levels on  
14  
15 30 subsequent stroke risk in a community-based cohort in China.  
16

17 31  
18  
19 32 **Design:** Prospective cohort study, employing Cox proportional hazard model to  
20  
21 33 analyze the association of FBG levels with stroke risk.  
22

23 34  
24  
25 35 **Setting:** A community-based cohort study included adults participating a baseline  
26  
27 36 survey conducted in 2013 in Changshu, eastern China.  
28

29 37  
30  
31 38 **Participants:** 16,113 participants were recruited with a multi-stage sampling method,  
32  
33 39 excluding participants with severe disability, severe cancer, severe psychiatric  
34  
35 40 disturbance, or previous stroke before enrolment.  
36

37 41  
38 42 **Primary outcome measures:** Stroke events.  
39

40 43  
41  
42 44 **Results:** During a median follow-up of 5.5 years, 417 incident cases of stroke were  
43  
44 45 identified. The adjusted HR for total and ischemic stroke for participants in the fourth  
45  
46 46 quartile of FBG compared with the first quartile was 1.44 (95% CI: 1.07, 1.94) and  
47  
48 47 1.57 (95% CI: 1.11, 2.21), respectively. FBG levels of  $\geq 7.0$  mmol/L was associated  
49  
50 48 with an increased risk of stroke based on two clinical classifications [ADA: 1.68  
51  
52 49 (1.24, 2.27); WHO: 1.62 (1.21, 2.13)]. In stratified analyses, risk associations existed  
53  
54 50 in women (HR: 1.92, 95% CI: 1.22, 3.01) and among postmenopausal women (HR:  
55  
56 51 1.68, 95% CI: 1.06-2.68) for the fourth quartile vs. the first. More importantly, the  
57  
58 52 meta-analysis observed a positive association between FBG levels and stroke risk  
59  
60 53 [pooled HR: 1.70, 95% CI: 1.27, 2.29; n=7)].

1  
2  
3  
4 54

5 55 **Conclusions:** Higher FBG level was independently associated with an increased risk  
6  
7 56 of stroke in Chinese adults, especially significant in women.

8  
9 57

10 58 **Keywords:** Stroke, Glucose, Risk, Cohort studies  
11  
12  
13  
14  
15  
16  
17  
18  
19  
20  
21  
22  
23  
24  
25  
26  
27  
28  
29  
30  
31  
32  
33  
34  
35  
36  
37  
38  
39  
40  
41  
42  
43  
44  
45  
46  
47  
48  
49  
50  
51  
52  
53  
54  
55  
56  
57  
58  
59  
60

For peer review only

1  
2  
3  
4 **59 Strengths and limitations of this study**

- 5  
6 60 ● Large sample size, measurement of plasma FBG, and complete follow-up.  
7  
8 61 ● The meta-analysis based on 6 previously published studies and the current study  
9  
10 62 further confirmed the association between fasting blood glucose levels and stroke  
11  
12 63 risk.  
13  
14 64 ● No data available on HbA1c measurements in our study.  
15  
16 65

17  
18  
19  
20  
21  
22  
23  
24  
25  
26  
27  
28  
29  
30  
31  
32  
33  
34  
35  
36  
37  
38  
39  
40  
41  
42  
43  
44  
45  
46  
47  
48  
49  
50  
51  
52  
53  
54  
55  
56  
57  
58  
59  
60

For peer review only



## 66 Introduction

67

68 Stroke is one of the most important causes of human diseases and death<sup>1</sup>. According  
69 to the statistics of global disease burden in 2013, about 25.7 million stroke patients  
70 and 6.5 million stroke deaths worldwide<sup>2</sup>. There are 113 million disability-adjusted  
71 life years caused by stroke each year<sup>3</sup>. It poses a heavy psychological and economic  
72 burden to patients' families and society. Therefore, the primary prevention of stroke  
73 has now become a top priority for global public health. In China, it has become the  
74 leading cause of death<sup>4</sup> and one of the important reasons for disability in adults<sup>5</sup>.

75

76 Studies have shown that diabetes mellitus can increase the risk of stroke<sup>6,7</sup>. A cohort  
77 study involving 510,000 people observed that diabetes significantly increased the risk  
78 of ischemic stroke and hematencephalon<sup>7</sup>. A prospective study showed that insulin  
79 resistance or diagnosed diabetes can predict the first stroke<sup>8</sup>. However, these studies  
80 focus on diabetes status instead of continuous glucose levels as the study exposure,  
81 which limits the generalizability of the research findings. Since fasting blood glucose  
82 (FBG) is the least interfered by diet<sup>9</sup>, the FBG levels are considered as a more reliable  
83 tool to measure blood glucose levels than random blood glucose levels<sup>10</sup>. FBG levels  
84 have a stronger predictive function for functional prognosis than random blood  
85 glucose levels. Therefore, rather than focusing on random blood glucose, it is  
86 important to explore the association between FBG levels and the risk of stroke.

87 In this study, a community population from China was followed up for 5.5 years to  
88 study the relationship between FBG levels and the incidence of stroke, aiming at  
89 providing suggestions and a basis for primary prevention of stroke among people with  
90 different FBG levels.

91

## 92 **Methods**

93

### 94 **Study population**

95

96 The baseline survey of the current cohort study was conducted in 2013. The source  
97 population was 20,343 participants aged 35-74 years in rural communities in  
98 Changshu, eastern China who participated in an earlier study on metabolic syndrome  
99 in 2008, in addition to a small proportion of new participants. A multi-stage sampling  
100 method was used to recruit participants. Individuals with severe disability, severe  
101 cancer, or a severe psychiatric disturbance were excluded. Of these, 16,457 subjects in  
102 total were included in the baseline survey. We excluded 137 patients with a previous  
103 stroke before enrolment. Participants with missing data on baseline health information  
104 (n=207) were also excluded, leaving 16,113 participants in total for final analyses  
105 (supplemental appendix S1).

106

### 107 **Laboratory measurements**

108

109 Blood samples were collected in the morning after overnight fasting and evaluated  
110 biochemical and clinical parameters on the same day. FBG was measured by an  
111 oxidase enzymatic method. The levels of high-density lipoprotein cholesterol (HDL-  
112 C), total cholesterol (TC), and triglyceride (TG) were assessed enzymatically using  
113 commercial reagents with an automatic biochemistry analyzer (Hitachi Inc, Tokyo,  
114 Japan). The levels of low-density lipoprotein cholesterol (LDL-C) were calculated by  
115 the Friedewald formula<sup>11</sup>. The estimated glomerular filtration rate (eGFR) was  
116 calculated on the basis of the chronic kidney disease-epidemiology creatinine  
117 equation<sup>12</sup>.

118

### 119 **Follow-up and ascertainment of stroke**

120

1  
2  
3  
4 121 Follow-up began at the baseline and ended at the date of stroke diagnosis, death, or  
5  
6 122 December 31, 2018, whichever came first. We classified total stroke into an ischemic  
7  
8 123 stroke, and non-ischemic stroke (including hemorrhagic stroke, subarachnoid  
9  
10 124 hemorrhage, and unexplained types of stroke). The primary outcome was  
11  
12 125 hospitalization or death due to stroke collected by ICD-10 codes (total stroke: I60-I61,  
13  
14 126 I63-I64; ischemic stroke: 63 except I63.9). If a participant had more than 1 stroke  
15  
16 127 event during the follow-up, only the first stroke was considered.  
17  
18 128

### 129 **Assessments of covariates**

130  
131 Demographic characteristics, lifestyle factors, personal medical history [CVD,  
132 hyperlipidemia, hypertension, diabetes, chronic obstructive pulmonary disease  
133 (COPD), nephropathy, and cancer], and family history data for all participants were  
134 obtained using standard questionnaires administered by trained staff. After the  
135 subjects rested for 5 minutes, the trained observers used an electronic  
136 sphygmomanometer (Omron Hp1300, OMRON Corporation, China) to measure the  
137 blood pressure in the sitting position three times every 30 seconds. The criteria for  
138 defining hypertension were an average measurement of systolic blood pressure  $\geq$   
139 140mmHg or diastolic blood pressure  $\geq$  90mmHg<sup>13</sup>, diagnosis of hypertension, or  
140 antihypertensive medication. Impaired fasting glucose (IFG) is defined as an FBG of  
141 6.1-6.9 mmol/L by WHO<sup>14</sup> and an FBG of 5.6-6.9 mmol/L by the American Diabetes  
142 Association (ADA)<sup>15</sup>. The body mass index (BMI) was calculated as weight in  
143 kilograms divided by the square of height in meters, among weight and height were  
144 measured by standard methods<sup>16</sup>.

### 146 **Meta-analysis**

147  
148 We conducted a meta-analysis combining the current study findings with previous  
149 observations on FBG and stroke risk. We searched PubMed, Web of Knowledge,  
150 medRxiv, and bioRxiv databases for related research articles published between

1  
2  
3  
4 151 January 01, 2000-September 10, 2020 using the keywords “stroke”, “cardiovascular  
5 152 disease” and “fasting blood glucose”, “blood glucose”, “fasting glucose”, “fasting  
6 153 plasma glucose”, “glucose”, in addition to “prospective study”, “cohort study”, or  
7 154 “follow-up”. The study subjects were restricted to apparently healthy adults in the  
8 155 community. Two authors extracted the data independently, and if they had  
9 156 disagreements, discussed it with the third author. This study was conducted following  
10 157 the Preferred Reporting Items for Systematic Reviews and Meta-Analyses (PRISMA)  
11 158 guideline. Finally, seven studies were included<sup>17-22</sup>. We extracted information about  
12 159 authors, sample size, the country where the study was implemented, time of follow-  
13 160 up, adjusted covariates, outcome (stroke events), and the effect size [hazard ratio  
14 161 (HR)]. The measurement and definition of FBG levels were directly extracted from  
15 162 each literature. We used a random-effect model to calculate the pooled risk estimation  
16 163 based on the assumption of study heterogeneity. The Begg and Egger tests were  
17 164 performed to detect potential publication bias<sup>23</sup>.

### 165 166 **Statistical analysis**

167  
168 Baseline demographic characteristics for continuous variables were expressed as  
169 median (interquartile ranges), and categorical variables were presented as  
170 percentages. Log-transformation was used to all laboratory measures to normalize  
171 distributions.

172  
173 Cox proportional hazard analyses were conducted to evaluate FBG levels and risk of  
174 stroke and results presented as HR and 95% confidence intervals (CI). FBG levels  
175 were included in the models as a categorical measure (quartiles and three categories  
176 by clinical criteria). Multivariable models included conventional risk factors at  
177 baseline: age (continuous), sex, BMI (continuous), current smoking (yes/no), family  
178 history of stroke (yes/no), hypertension (yes/no), eGFR(ml/min/1.73m<sup>2</sup>) LDL-C  
179 (mmol/L), HDL-C (mmol/L), TC (mmol/L), TG (mmol/L) and use of statins. We also  
180 used clinical classification (normal FBG, IFG, hyperglycemia) to classify FBG levels.

1  
2  
3  
4 181 In addition, we conducted stratified analyses by sex to check potential effect  
5  
6 182 modification. Sensitivity analyses were conducted to determine the robustness of the  
7  
8 183 primary analysis results. We limited the risk-association analyses to participants who  
9  
10 184 didn't report their own medical history, including hypertension, hyperlipidemia,  
11  
12 185 cancer, nephropathy, CVD, or COPD at baseline.

13  
14 186

15 187 Statistical analyses were conducted with R (version 4.0.2, [www.r-project.org](http://www.r-project.org)). All  
16  
17 188 tests were 2-sided, and a P value less than 0.05 was considered statistically  
18  
19 189 significant.

20  
21 190

22  
23 191

#### 24 25 192 **Patient and public involvement**

26  
27 193

28  
29 194 Patients and the public were not involved in the design, conduct, or reporting of this  
30  
31 195 study.

## 196 **Results**

197

### 198 **Characteristics of the study population**

199

200 After a median follow-up of 5.5 years (range: 0.1-5.7 years), a total of 417 (192 men  
201 and 225 women) stroke events were identified, of which 323 (77.5%) were ischemic  
202 stroke. Table 1 shows the baseline characteristics of participants across the quartiles  
203 of FBG. Compared with the participants in the study with lower FBG, those with  
204 higher FBG levels were more likely to suffer from obesity, hypertension, and  
205 hyperlipidemia, had lower levels of eGFR, and preferred to have a family history of  
206 stroke ( $P<0.001$ , Table 1).

207

### 208 **FBG levels and risk of stroke**

209

210 As shown in Table 2, we observed that higher FBG levels were significantly  
211 correlated with an increased risk of total and ischemic stroke in both the original  
212 models and models adjusted for age, sex, BMI, HDL-C, LDL-C, TC, TG, eGFR,  
213 hypertension, smoking status, use of statins and family history of stroke. Compared to  
214 the lowest FBG quartile, the multivariable-adjusted HRs for the highest quartile were  
215 1.44 (95% CI: 1.07-1.94,  $P=0.021$ ) for total and 1.57 (95%CI: 1.11-2.21,  $P=0.016$ ) for  
216 ischemic stroke. A positive association between FBG levels and non-ischemic stroke  
217 was observed in the crude model, but the risk association was rendered statistically  
218 nonsignificant in adjusted models. Further, we examined the association between  
219 clinical classifications of FBG levels and stroke risk, and the results are presented in  
220 Table 3. The multivariable-adjusted HR for total stroke was 1.68 (95%CI: 1.24-2.27,  
221  $P=0.001$ ) and 1.62 (95% CI: 1.21-2.13,  $P=0.002$ ) for participants with hyperglycemia  
222 compared with those with normal blood glucose, following the ADA and WHO  
223 recommendations, respectively.

224

1  
2  
3  
4 225 Results of sex-stratified analyses are shown in Table 4. In original models, higher  
5  
6 226 levels of FBG were significantly associated with an increased risk of total stroke only  
7  
8 227 in women. After adjustment covariate for age, BMI, and other variates, the risk  
9  
10 228 association remained significant (HR: 1.92, 95%CI: 1.22-3.01, P=0.004) for the  
11  
12 229 fourth level in female groups. Similar risk estimates were found in postmenopausal or  
13  
14 230 oophorectomy women. But no significant association with stroke was observed for  
15  
16 231 FBG levels in premenopausal women (supplemental appendix S2).

17  
18 232

19 233 In sensitivity analyses, the study population was restricted to 15,404 subjects without  
20  
21 234 a self-reported history of hyperlipidemia, CVD, cancer, nephropathy, and COPD  
22  
23 235 yielded essentially no change in risk of total stroke (HR: 1.38, 95% CI: 1.01, 1.92)  
24  
25 236 and ischemic stroke (HR: 1.55, 95% CI: 1.06, 2.26). Additional eliminated for  
26  
27 237 participants with hypertension, the association in women was slightly raised for total  
28  
29 238 stroke (HR: 2.50, 95% CI: 1.11, 5.60) and ischemic stroke (HR: 2.59, 95% CI: 1.03,  
30  
31 239 6.51) (data not shown).

32  
33 240

#### 34 241 **Meta-analysis**

35  
36 242

37  
38 243 Figure 1 shows the results of meta-analysis including six previously published  
39  
40 244 prospective studies together with our current study. In a word, higher FBG levels  
41  
42 245 were associated with an increased risk of stroke (pooled HR: 1.70, 95% CI: 1.27-  
43  
44 246 2.29). The Begg and Egger tests didn't suggest existence of potential publication bias  
45  
46 247 (P>0.1 for both tests).

## 249 **Discussion**

250

### 251 **Principal findings**

252

253 In our prospective community-based cohort, higher FBG levels were associated with  
254 an increased risk of total and ischemic stroke. The risk-association was prominent in  
255 women. After excluding the baseline of hypertension, hyperlipidemia, CVD, cancer,  
256 nephropathy, and COPD, these associations were still persisted in analyses of women.  
257 Our findings extend the previous knowledge on diabetes and stroke risk, suggesting  
258 an important role of routine glucose measurement in stroke prevention.

259

### 260 **Associations of FBG with stroke risk**

261

262 When analyzing stroke subtypes, there is no evidence that FBG is associated with  
263 non-ischemic stroke, but the association with ischemic stroke persists. This is  
264 consistent with the results of a prospective cohort study among Korean men<sup>14</sup>. It  
265 suggests that the correlation between FBG and stroke is mainly contributed by an  
266 ischemic stroke. A large-scale prospective study in China (including 96,110  
267 participants) indicated that both hyperglycemia and hypoglycemia are associated with  
268 an increased risk of incident intracerebral hemorrhage, after adjustment for potential  
269 confounders<sup>24</sup>.

270

271 Results based on the ADA and WHO criteria demonstrated that FBG levels of  $\geq 7.0$   
272 mmol/L were a significant risk factor for stroke [HR (95% CI): 1.68 (1.24, 2.27) and  
273 1.62 (1.21, 2.13) following the ADA and WHO criteria, respectively], whereas the  
274 risk of stroke in patients with IFG had an increase trend but this trend was not  
275 statistically significant. A large number of studies showed that people with diabetes  
276 are at increased risk of ischemic stroke<sup>25 26</sup>. A meta-analysis including 698,782  
277 participants reported that the risk of ischemic stroke in diabetic patients was 2.27



1  
2  
3  
4 278 times higher than normal people<sup>25</sup>. A cohort study in Swedish also showed that poor  
5  
6 279 blood glucose control in patients with type 2 diabetes was associated with an  
7  
8 280 increased risk of stroke and death<sup>26</sup>. Although diabetes is associated with stroke, the  
9  
10 281 influence of prediabetes on future stroke risk has not been clear yet. Some large  
11  
12 282 sample meta-analyses reported prediabetes is associated with the risk of CVD<sup>27 28</sup> and  
13  
14 283 heart failure<sup>29</sup>. But in another meta-analysis including 15 cohort studies, more than  
15  
16 284 half of the studies showed that after adjusting for cardiovascular risk factors, there  
17  
18 285 was no significant association between pre-diabetes and stroke<sup>30</sup>. A cohort study  
19  
20 286 investigated the sex-specific associations of pre-diabetes with major clinical outcomes  
21  
22 287 reached the same conclusion<sup>31</sup>.

23  
24 288  
25  
26 289 Stratified analysis showed that the correlation between FBG levels and stroke risk  
27  
28 290 only existed in women. According to the re-stratification of menopause, only  
29  
30 291 postmenopausal women with the highest FBG level had a higher risk of stroke [HR  
31  
32 292 (95% CI): 1.68 (1.06, 2.68)], no associations were found in premenopausal women. It  
33  
34 293 probably due to the low number of stroke events in premenopausal women. Few  
35  
36 294 published studies reported sex-stratified results. A sex-specific cohort study in the  
37  
38 295 Middle East showed that only men with higher FBG levels showed an increased risk  
39  
40 296 of stroke [HR: 2.15(1.26, 4.67) in FBG level of 6.1-6.9 mmol/L, HR: 2.38 (1.08, 5.25)  
41  
42 297 in FBG level of >7.0 mmol/L]<sup>32</sup>. Korean Heart Study showed that IFG was associated  
43  
44 298 with an increased risk of ischemic stroke in men but not in women<sup>33</sup>. We suspect that  
45  
46 299 the disparities in sex between studies could be due to different definitions of outcome  
47  
48 300 (all stroke vs. ischemic stroke) and the variety in covariate adjustments. A meta-  
49  
50 301 analysis including 64 cohort studies provides the clearest evidence yet for the sex  
51  
52 302 difference of diabetes and stroke risk. The excess risk of diabetes-related stroke in  
53  
54 303 women is significantly higher than that in men and independent of sex-difference in  
55  
56 304 other cardiovascular risk factors<sup>34</sup>. Our results support the findings of this meta-  
57  
58 305 analysis, indicating that the association between FBG levels and stroke cases in  
59  
60 306 women, and the mechanism may be related to the protective effect of estrogen.

307

**308 Possible mechanisms**

309

310 Accumulating evidence suggests that FBG levels can be used to predict the risk of  
311 CVD<sup>20 25 35</sup>. As an adverse consequence of CVD, stroke is closely related to FBG  
312 levels<sup>36 37</sup>. Its mechanism may be related to the dysfunction of cerebral  
313 microvasculature caused by hyperglycemia, insulin resistance, obesity, and  
314 hypertension<sup>38</sup>. The microvasculature is involved in the regulation of many brain  
315 processes. Once damaged, it's easy to cause cerebrovascular accidents<sup>39</sup>. The  
316 dysfunction is also obvious in the prediabetes population, which may suggest that IFG  
317 is the risk factor for stroke<sup>40</sup>. Besides, diabetic retinopathy was proved to be a sign of  
318 lacunar ischemic stroke, which had the same effects as cerebral microvascular  
319 dysfunction<sup>41</sup>.

320

321 Compared with men, women with diabetes are at higher risk of stroke<sup>34</sup>. Previously, it  
322 was thought that the sex specificity of the severity of diabetes-related cardiovascular  
323 diseases was caused by the differences between men and women in treatment and  
324 chronic disease management. However, as the gradual equality of men and women,  
325 the risk of serious cardiovascular disease in postmenopausal women is still higher<sup>34</sup>.  
326 Sex hormones may explain the sex differences observed in human epidemiological  
327 studies<sup>42-44</sup>, indicating the estrogen protection in women, preventing the progression  
328 of non-diabetic cardiovascular diseases at least before menopause. Animal  
329 experiments show that the decrease of estrogen levels in ovariectomized mice can  
330 lead to impaired glycemia, reduced glucose tolerance, hyperinsulinemia, and impaired  
331 insulin secretion, and then develop into hyperglycemia and atherosclerosis<sup>45</sup>.  
332 However, diabetes seemingly attenuates the protective effect of estrogen on women in  
333 the development of CVD<sup>46</sup>.

334

**335 Strengths and Limitations**

336

1  
2  
3  
4 337 The main strengths of this study include the large sample size, measurement of  
5  
6 338 plasma FBG, and the complete follow-up. We followed up the cases by recording  
7  
8 339 linkages with hospital discharge diagnoses and the Cause of Death Registry. We used  
9  
10 340 both quartiles and clinical classifications (normal FBG, IFG, hyperglycemia) to  
11  
12 341 classify FBG levels, and obtained similar results. We considered different stroke  
13  
14 342 subtypes as the study outcome. To our knowledge, this study provides the first meta-  
15  
16 343 analysis investigating the association between FBG levels and stroke risk in the  
17  
18 344 general population, therefore results are likely generalizable to all races.  
19

20 345

21 346 Our study has several limitations. First, we do not have HbA<sub>1c</sub> measurements in this  
22  
23 347 study. Among indicators to assess glucose variability, HbA<sub>1c</sub> is the gold standard for  
24  
25 348 clinical evaluation of long-term blood glucose control<sup>8</sup>, while FBG may overlook the  
26  
27 349 potential effects of postprandial blood glucose levels and other meaningful factors<sup>47</sup>.  
28  
29 350 Reports revealed that HbA<sub>1c</sub> played an important role in distinguishing people with  
30  
31 351 high cardiovascular risk from those without diabetes<sup>48 49</sup>. Second, the levels of  
32  
33 352 estradiol and testosterone in the study subjects were not measured, although we  
34  
35 353 speculated that the sex difference was probably due to the protective effect of sex  
36  
37 354 hormone. Third, due to a low number of stroke cases, the real risk association of the  
38  
39 355 premenopausal population may be biased.

40  
41 356  
42  
43  
44  
45  
46  
47  
48  
49  
50  
51  
52  
53  
54  
55  
56  
57  
58  
59  
60

1  
2  
3  
4 357 **Conclusions**

5  
6 358

7  
8  
9 359 Our study indicates that higher FBG levels are associated with an increased stroke in  
10 360 the general population, and meta-analysis corroborated this finding. Further, we  
11  
12 361 observed that the association was more prominent in women than in men. We also  
13  
14 362 observed strong risk associations among postmenopausal or oophorectomy women.  
15  
16 363 FBG levels as a routine and low-cost measurement could be used to identify  
17  
18 364 individuals with higher stroke risk in the future.  
19  
20  
21  
22  
23  
24  
25  
26  
27  
28  
29  
30  
31  
32  
33  
34  
35  
36  
37  
38  
39  
40  
41  
42  
43  
44  
45  
46  
47  
48  
49  
50  
51  
52  
53  
54  
55  
56  
57  
58  
59  
60

1  
2  
3  
4 **365 Contributors**

5  
6  
7 366

8  
9 367 Conceptualization, YZ and HZ; methodology, YZ; software, YZ; validation, YZ;  
10 368 formal analysis, YZ; resources, SG, QZ, MY and ZZ; data curation, YZ; visualization,  
11 369 YZ; investigation, YZ, CW and DL; writing—original draft preparation, YZ and SG;  
12 370 writing—review and editing, YZ and HZ; supervision, HZ; project administration,  
13 371 HZ; funding acquisition, SG and HZ. All authors have agreed on the journal to which  
14 372 the article has been submitted and agreed to be accountable for all aspects of the  
15 373 work. All authors read and approved the final manuscript.

16  
17  
18  
19  
20  
21  
22 374

23  
24  
25 **375 Funding**

26  
27 376

28  
29 377 This work was supported by the National Natural Science Foundation of China [Nos.  
30 378 81973122].

31  
32  
33 379

34  
35 **380 Competing interests**

36  
37  
38 381

39  
40 382 None declared.

41  
42 383

43  
44 **384 Patient consent for publication**

45  
46  
47 385

48  
49 386 Not required.

50  
51 387

52  
53 **388 Ethics approval**

54  
55  
56 389

57  
58 390 The study protocol conforms to the ethical guidelines of the Declaration of Helsinki.

59  
60 391 The baseline survey and record linkages with study outcomes were approved by the

1  
2  
3  
4 392 Ethics Committee of Fuwai Cardiovascular Hospital, Beijing, China (No. 2012-399).

5 393 After a detailed explanation of our study, we obtained a written informed consent

6  
7 394 form from each participant.

8  
9 395

10  
11 396 **Provenance and peer review**

12  
13  
14 397

15  
16 398 Not commissioned; externally peer reviewed.

17  
18 399

19  
20 400 **Data availability statement**

21  
22  
23 401

24  
25 402 The datasets generated and/or analyzed during the current study are not publicly

26  
27 403 available due to the restrictions of containing information that could compromise the

28  
29 404 privacy of research participants.

30  
31  
32  
33  
34  
35  
36  
37  
38  
39  
40  
41  
42  
43  
44  
45  
46  
47  
48  
49  
50  
51  
52  
53  
54  
55  
56  
57  
58  
59  
60

405 **References**

406

- 407 1. Feigin VL, Roth GA, Naghavi M, et al. Global burden of stroke and risk factors in 188  
408 countries, during 1990-2013: a systematic analysis for the Global Burden of Disease  
409 Study 2013. *Lancet Neurol* 2016;15(9):913-24. doi: 10.1016/S1474-4422(16)30073-4.
- 410 2. Feigin VL, Norrving B, Mensah GA. Global Burden of Stroke. *Circ Res* 2017;120(3):439-48.  
411 doi: 10.1161/CIRCRESAHA.116.308413.
- 412 3. Feigin VL, Krishnamurthi RV, Parmar P, et al. Update on the Global Burden of Ischemic  
413 and Hemorrhagic Stroke in 1990-2013: The GBD 2013 Study. *Neuroepidemiology*  
414 2015;45(3):161-76. doi: 10.1159/000441085.
- 415 4. Wang W, Jiang B, Sun H, et al. Prevalence, Incidence, and Mortality of Stroke in China:  
416 Results from a Nationwide Population-Based Survey of 480 687 Adults. *Circulation*  
417 2017;135(8):759-71. doi: 10.1161/CIRCULATIONAHA.116.025250.
- 418 5. Liu LP, Wong LK, Wang DZ, et al. Current status of endovascular procedures in  
419 management of ischemic stroke in China. *CNS Neurosci Ther* 2014;20(6):483-4. doi:  
420 10.1111/cns.12281.
- 421 6. Banerjee C, Moon YP, Paik MC, et al. Duration of diabetes and risk of ischemic stroke: the  
422 Northern Manhattan Study. *Stroke* 2012;43(5):1212-7. doi:  
423 10.1161/STROKEAHA.111.641381.
- 424 7. Bragg F, Li L, Yang L, et al. Risks and Population Burden of Cardiovascular Diseases  
425 Associated with Diabetes in China: A Prospective Study of 0.5 Million Adults. *PLoS*  
426 *Med* 2016;13(7):e1002026. doi: 10.1371/journal.pmed.1002026.
- 427 8. Jia Z, Wu S, Zhou Y, et al. Metabolic syndrome and its components as predictors of stroke

- 1  
2  
3  
4 428 in middle-aged and elderly Chinese people. *Neurol Res* 2011;33(5):453-9. doi:  
5  
6  
7 429 10.1179/016164111X13007856083882.  
8  
9 430 9. Moebus S, Gores L, Losch C, et al. Impact of time since last caloric intake on blood  
10  
11 431 glucose levels. *Eur J Epidemiol* 2011;26(9):719-28. doi: 10.1007/s10654-011-9608-z.  
12  
13  
14 432 10. Morris HJDC. Standards of Medical Care in Diabetes. 2014;36(Suppl 1):S11-S66.  
15  
16  
17 433 11. Friedewald WT, Levy RI, Fredrickson DS. Estimation of the concentration of low-density  
18  
19 434 lipoprotein cholesterol in plasma, without use of the preparative ultracentrifuge. *Clin*  
20  
21 435 *Chem* 1972;18(6):499-502.  
22  
23  
24 436 12. Levey AS, Stevens LA, Schmid CH, et al. A new equation to estimate glomerular filtration  
25  
26 437 rate. *Ann Intern Med* 2009;150(9):604-12. doi: 10.7326/0003-4819-150-9-200905050-  
27  
28 438 00006.  
29  
30  
31 439 13. Clinical WHOJ, Hypertension E. International Society of Hypertension Guidelines for the  
32  
33 440 Management of Hypertension. Guidelines Subcommittee. 1999;21(5-6):1009-60.  
34  
35  
36 441 14. Organization WH. Use of glycated haemoglobin (HbA1c) in diagnosis of diabetes mellitus:  
37  
38 442 abbreviated report of a WHO consultation: World Health Organization, 2011.  
39  
40  
41 443 15. American Diabetes A. Standards of Medical Care in Diabetes-2020 Abridged for Primary  
42  
43 444 Care Providers. *Clin Diabetes* 2020;38(1):10-38. doi: 10.2337/cd20-as01.  
44  
45  
46 445 16. Kok P, Seidell JC, Meinders AE. [The value and limitations of the body mass index (BMI)  
47  
48 446 in the assessment of the health risks of overweight and obesity]. *Ned Tijdschr*  
49  
50 447 *Geneeskd* 2004;148(48):2379-82.  
51  
52  
53 448 17. Nielson C, Fleming RM. Blood glucose and cerebrovascular disease in nondiabetic  
54  
55 449 patients. *Angiology* 2007;58(5):625-9. doi: 10.1177/0003319707303695.  
56  
57  
58  
59  
60



- 1  
2  
3  
4 450 18. Boden-Albala B, Cammack S, Chong J, et al. Diabetes, fasting glucose levels, and risk of  
5  
6 451 ischemic stroke and vascular events: findings from the Northern Manhattan Study  
7  
8  
9 452 (NOMAS). *Diabetes Care* 2008;31(6):1132-7. doi: 10.2337/dc07-0797.  
10  
11  
12 453 19. Sung J, Song YM, Ebrahim S, et al. Fasting blood glucose and the risk of stroke and  
13  
14 454 myocardial infarction. *Circulation* 2009;119(6):812-9. doi:  
15  
16  
17 455 10.1161/CIRCULATIONAHA.108.776989.  
18  
19  
20 456 20. Liu F, Yang X, Li J, et al. Association of fasting glucose levels with incident atherosclerotic  
21  
22 457 cardiovascular disease: An 8-year follow-up study in a Chinese population. *J*  
23  
24 458 *Diabetes* 2017;9(1):14-23. doi: 10.1111/1753-0407.12380.  
25  
26  
27 459 21. Lee G, Kim SM, Choi S, et al. The effect of change in fasting glucose on the risk of  
28  
29 460 myocardial infarction, stroke, and all-cause mortality: a nationwide cohort study.  
30  
31 461 *Cardiovasc Diabetol* 2018;17(1):51. doi: 10.1186/s12933-018-0694-z.  
32  
33  
34 462 22. Peng X, Ge J, Wang C, et al. Longitudinal Average Glucose Levels and Variance and  
35  
36 463 Risk of Stroke: A Chinese Cohort Study. *Int J Hypertens* 2020;2020:8953058. doi:  
37  
38 464 10.1155/2020/8953058.  
39  
40  
41 465 23. Begg CB, Mazumdar M. Operating characteristics of a rank correlation test for publication  
42  
43 466 bias. *Biometrics* 1994;50(4):1088-101.  
44  
45  
46 467 24. Jin C, Li G, Rexrode KM, et al. Prospective Study of Fasting Blood Glucose and  
47  
48 468 Intracerebral Hemorrhagic Risk. *Stroke* 2018;49(1):27-33. doi:  
49  
50 469 10.1161/STROKEAHA.117.019189.  
51  
52  
53 470 25. Emerging Risk Factors C, Sarwar N, Gao P, et al. Diabetes mellitus, fasting blood glucose  
54  
55 471 concentration, and risk of vascular disease: a collaborative meta-analysis of 102  
56  
57  
58  
59  
60

- 1  
2  
3  
4 472 prospective studies. *Lancet* 2010;375(9733):2215-22. doi: 10.1016/S0140-  
5  
6 473 6736(10)60484-9.  
7  
8  
9 474 26. Zabala A, Darsalia V, Holzmann MJ, et al. Risk of first stroke in people with type 2  
10  
11 475 diabetes and its relation to glycaemic control: A nationwide observational study.  
12  
13 476 *Diabetes Obes Metab* 2020;22(2):182-90. doi: 10.1111/dom.13885.  
14  
15  
16  
17 477 27. Cai X, Zhang Y, Li M, et al. Association between prediabetes and risk of all cause  
18  
19 478 mortality and cardiovascular disease: updated meta-analysis. *BMJ* 2020;370:m2297.  
20  
21 479 doi: 10.1136/bmj.m2297.  
22  
23  
24 480 28. Huang Y, Cai X, Mai W, et al. Association between prediabetes and risk of cardiovascular  
25  
26 481 disease and all cause mortality: systematic review and meta-analysis. *BMJ*  
27  
28 482 2016;355:i5953. doi: 10.1136/bmj.i5953.  
29  
30  
31 483 29. Cai X, Liu X, Sun L, et al. Prediabetes and the risk of heart failure: A meta-analysis.  
32  
33 484 *Diabetes Obes Metab* 2021 doi: 10.1111/dom.14388.  
34  
35  
36  
37 485 30. Lee M, Saver JL, Hong KS, et al. Effect of pre-diabetes on future risk of stroke: meta-  
38  
39 486 analysis. *BMJ* 2012;344:e3564. doi: 10.1136/bmj.e3564.  
40  
41  
42 487 31. Shang Y, Fratiglioni L, Marseglia A, et al. Association of diabetes with stroke and post-  
43  
44 488 stroke dementia: A population-based cohort study. *Alzheimers Dement*  
45  
46 489 2020;16(7):1003-12. doi: 10.1002/alz.12101.  
47  
48  
49  
50 490 32. Parizadeh D, Rahimian N, Akbarpour S, et al. Sex-specific clinical outcomes of impaired  
51  
52 491 glucose status: A long follow-up from the Tehran Lipid and Glucose Study. *Eur J Prev*  
53  
54 492 *Cardiol* 2019;26(10):1080-91. doi: 10.1177/2047487319834396.  
55  
56  
57  
58 493 33. Kim HK, Kim CH, Kim EH, et al. Impaired fasting glucose and risk of cardiovascular  
59  
60

- 1  
2  
3  
4 494 disease in Korean men and women: the Korean Heart Study. *Diabetes Care*  
5  
6 495 2013;36(2):328-35. doi: 10.2337/dc12-0587.  
7  
8  
9 496 34. Peters SA, Huxley RR, Woodward M. Diabetes as a risk factor for stroke in women  
10  
11 497 compared with men: a systematic review and meta-analysis of 64 cohorts, including  
12  
13 498 775,385 individuals and 12,539 strokes. *Lancet* 2014;383(9933):1973-80. doi:  
14  
15 499 10.1016/S0140-6736(14)60040-4.  
16  
17  
18  
19 500 35. Bragg F, Li L, Smith M, et al. Associations of blood glucose and prevalent diabetes with  
20  
21 501 risk of cardiovascular disease in 500 000 adult Chinese: the China Kadoorie Biobank.  
22  
23 502 *Diabet Med* 2014;31(5):540-51. doi: 10.1111/dme.12392.  
24  
25  
26  
27 503 36. Luitse MJ, Biessels GJ, Rutten GE, et al. Diabetes, hyperglycaemia, and acute ischaemic  
28  
29 504 stroke. *Lancet Neurol* 2012;11(3):261-71. doi: 10.1016/S1474-4422(12)70005-4.  
30  
31  
32 505 37. Liu J, Rutten-Jacobs L, Liu M, et al. Causal Impact of Type 2 Diabetes Mellitus on  
33  
34 506 Cerebral Small Vessel Disease: A Mendelian Randomization Analysis. *Stroke*  
35  
36 507 2018;49(6):1325-31. doi: 10.1161/STROKEAHA.117.020536.  
37  
38  
39 508 38. van Sloten TT, Sedaghat S, Carnethon MR, et al. Cerebral microvascular complications of  
40  
41 509 type 2 diabetes: stroke, cognitive dysfunction, and depression. *Lancet Diabetes*  
42  
43 510 *Endocrinol* 2020;8(4):325-36. doi: 10.1016/S2213-8587(19)30405-X.  
44  
45  
46  
47 511 39. Wardlaw JM, Smith C, Dichgans M. Small vessel disease: mechanisms and clinical  
48  
49 512 implications. *Lancet Neurol* 2019;18(7):684-96. doi: 10.1016/S1474-4422(19)30079-  
50  
51 513 1.  
52  
53  
54  
55 514 40. Stehouwer CDA. Microvascular Dysfunction and Hyperglycemia: A Vicious Cycle With  
56  
57 515 Widespread Consequences. *Diabetes* 2018;67(9):1729-41. doi: 10.2337/dbi17-0044.  
58  
59  
60

- 1  
2  
3  
4 516 41. Hankey GJ, Anderson NE, Ting RD, et al. Rates and predictors of risk of stroke and its  
5  
6 517 subtypes in diabetes: a prospective observational study. *J Neurol Neurosurg*  
7  
8  
9 518 *Psychiatry* 2013;84(3):281-7. doi: 10.1136/jnnp-2012-303365.  
10  
11  
12 519 42. Brann DW, Dhandapani K, Wakade C, et al. Neurotrophic and neuroprotective actions of  
13  
14 520 estrogen: basic mechanisms and clinical implications. *Steroids* 2007;72(5):381-405.  
15  
16  
17 521 doi: 10.1016/j.steroids.2007.02.003.  
18  
19  
20 522 43. Howard VJ, Madsen TE, Kleindorfer DO, et al. Sex and Race Differences in the  
21  
22 523 Association of Incident Ischemic Stroke With Risk Factors. *JAMA Neurol*  
23  
24 524 2019;76(2):179-86. doi: 10.1001/jamaneurol.2018.3862.  
25  
26  
27 525 44. Reeves MJ, Bushnell CD, Howard G, et al. Sex differences in stroke: epidemiology,  
28  
29  
30 526 clinical presentation, medical care, and outcomes. *Lancet Neurol* 2008;7(10):915-26.  
31  
32 527 doi: 10.1016/S1474-4422(08)70193-5.  
33  
34  
35 528 45. Venegas-Pino DE, Wang PW, Stoute HK, et al. Sex-Specific Differences in an ApoE(-  
36  
37 529 /-):Ins2(+)/Akita) Mouse Model of Accelerated Atherosclerosis. *Am J Pathol*  
38  
39 530 2016;186(1):67-77. doi: 10.1016/j.ajpath.2015.09.009.  
40  
41  
42  
43 531 46. Kautzky-Willer A, Harreiter J, Pacini G. Sex and Gender Differences in Risk,  
44  
45 532 Pathophysiology and Complications of Type 2 Diabetes Mellitus. *Endocr Rev*  
46  
47 533 2016;37(3):278-316. doi: 10.1210/er.2015-1137.  
48  
49  
50 534 47. Jia Q, Zheng H, Zhao X, et al. Abnormal glucose regulation in patients with acute stroke  
51  
52 535 across China: prevalence and baseline patient characteristics. *Stroke*  
53  
54 536 2012;43(3):650-7. doi: 10.1161/STROKEAHA.111.633784.  
55  
56  
57  
58 537 48. Di Pino A, Mangiafico S, Urbano F, et al. HbA1c Identifies Subjects With Prediabetes and  
59  
60

- 1  
2  
3  
4 538 Subclinical Left Ventricular Diastolic Dysfunction. *J Clin Endocrinol Metab*  
5  
6 539 2017;102(10):3756-64. doi: 10.1210/jc.2017-00954.  
7  
8  
9 540 49. Selvin E, Steffes MW, Zhu H, et al. Glycated hemoglobin, diabetes, and cardiovascular  
10  
11 541 risk in nondiabetic adults. *N Engl J Med* 2010;362(9):800-11. doi:  
12  
13 542 10.1056/NEJMoa0908359.  
14  
15  
16  
17  
18  
19  
20  
21  
22  
23  
24  
25  
26  
27  
28  
29  
30  
31  
32  
33  
34  
35  
36  
37  
38  
39  
40  
41  
42  
43  
44  
45  
46  
47  
48  
49  
50  
51  
52  
53  
54  
55  
56  
57  
58  
59  
60

For peer review only

1  
2  
3  
4 544 **Figure 1.** Meta-analysis of fasting blood glucose at the highest vs lowest levels and the  
5 545 risk of developing stroke. The horizontal lines indicate the lower and upper limits of  
6  
7 546 the 95% CI, and the grey squares reflects the HR of each study. HR: Hazard Ratio.  
8  
9  
10  
11  
12  
13  
14  
15  
16  
17  
18  
19  
20  
21  
22  
23  
24  
25  
26  
27  
28  
29  
30  
31  
32  
33  
34  
35  
36  
37  
38  
39  
40  
41  
42  
43  
44  
45  
46  
47  
48  
49  
50  
51  
52  
53  
54  
55  
56  
57  
58  
59  
60

For peer review only

**Table 1.** Baseline characteristics of study population by FBG levels and stroke risk: Cohort Changshu.

| Characteristic                    | Total                 | Quartile of FBG Levels (mmol/L) |                          |                          |                       | P Value |
|-----------------------------------|-----------------------|---------------------------------|--------------------------|--------------------------|-----------------------|---------|
|                                   | n=16,113              | Q1 (< 4.87)<br>n=4097           | Q2 (4.87-5.24)<br>n=4027 | Q3 (5.24-5.77)<br>n=3979 | Q4 (> 5.77)<br>n=4010 |         |
| Age, yrs                          | 55.7 (46.3, 64.4)     | 48.6 (41.4, 59.1)               | 53.8 (44.8, 62.84)       | 57.8 (48.6, 65.9)        | 60.0 (51.4, 67.2)     | <0.001  |
| Men (%)                           | 40.9                  | 42.1                            | 39.4                     | 40.2                     | 42.1                  | 0.002   |
| Premenopausal in women (%)        | 37.5                  | 55.3                            | 42.3                     | 29.7                     | 22.3                  | <0.001  |
| Follow-up time, yrs               | 5.53 (5.49, 5.56)     | 5.52 (5.49, 5.54)               | 5.52 (5.49, 5.55)        | 5.53 (5.50, 5.57)        | 5.55 (5.50, 5.58)     | <0.001  |
| BMI (kg/m <sup>2</sup> )          | 23.3 (21.2, 25.7)     | 22.6 (20.6, 24.9)               | 23.0 (21.0, 25.3)        | 23.6 (21.5, 25.9)        | 24.2 (22.0, 26.5)     | <0.001  |
| Current smoking (%)               | 23.6                  | 26.9                            | 23.5                     | 21.9                     | 21.9                  | <0.001  |
| Family history of stroke (%)      | 5.8                   | 3.8                             | 5.4                      | 6.5                      | 7.6                   | <0.001  |
| Hypertension (%)                  | 22.8                  | 13.9                            | 18.6                     | 24.9                     | 34.0                  | <0.001  |
| Fasting blood glucose, mmol/L     | 5.24 (4.87, 5.77)     | 4.66 (4.47, 4.77)               | 5.06 (4.97, 5.15)        | 5.47 (5.34, 5.60)        | 6.37 (6.01, 7.20)     | <0.001  |
| impaired fasting glucose (%)      | 8.6                   | —                               | —                        | —                        | 34.7                  | <0.001  |
| Diabetes (%)                      | 8.8                   | 0.6                             | 0.7                      | 1.0                      | 33.3                  | <0.001  |
| TC, mmol/L                        | 4.70 (4.13, 5.36)     | 4.48 (3.95, 5.04)               | 4.62 (4.08, 5.23)        | 4.79 (4.22, 5.44)        | 4.99 (4.36, 5.70)     | <0.001  |
| TG, mmol/L                        | 1.32 (0.96, 1.90)     | 1.20 (0.88, 1.68)               | 1.26 (0.93, 1.78)        | 1.33 (0.97, 1.91)        | 1.52 (1.08, 2.30)     | <0.001  |
| HDL-C, mmol/L                     | 1.38 (1.14, 1.66)     | 1.36 (1.14, 1.62)               | 1.37 (1.14, 1.64)        | 1.40 (1.15, 2.68)        | 1.38 (1.14, 1.69)     | <0.001  |
| LDL-C, mmol/L                     | 2.57 (1.92, 3.27)     | 2.64 (2.03, 3.34)               | 2.62 (1.97, 3.30)        | 2.55 (1.89, 3.26)        | 2.47 (1.79, 3.17)     | <0.001  |
| eGFR (ml/min/1.73m <sup>2</sup> ) | 95.59 (84.39, 105.42) | 100.88 (89.80, 110.06)          | 96.744 (86.38, 106.50)   | 93.60 (83.12, 102.95)    | 91.65 (79.13, 101.17) | <0.001  |
| Use of statins (%)                | 0.4                   | 0.1                             | 0.3                      | 0.3                      | 0.7                   | <0.001  |

<sup>1</sup> BMI, body mass index; HDL-C, high density lipoprotein cholesterol; Q, quartile; TC, total cholesterol; TG, triglyceride.

<sup>2</sup> P Values were determined by Chi-square tests for categorical and Kruskal-Wallis tests for continuous variables.

**Table 2.** Hazard ratios (95% CI) for incident stroke by FBG quartiles

|                     |         | Quartile of FBG Levels |                   |                   |                   | P trend |
|---------------------|---------|------------------------|-------------------|-------------------|-------------------|---------|
|                     |         | Q1                     | Q2                | Q3                | Q4                |         |
|                     |         | HR (95%CI)             | HR (95%CI)        | HR (95%CI)        | HR (95%CI)        |         |
| Total stroke        | Cases/N | 57/4097                | 89/4027           | 110/3979          | 161/4010          |         |
|                     | Model 1 | 1 (Ref.)               | 1.60 (1.15, 2.22) | 2.00 (1.45, 2.75) | 2.92 (2.16, 3.94) | <0.001  |
|                     | Model 2 | 1 (Ref.)               | 1.21 (0.87, 1.69) | 1.17 (0.85, 1.62) | 1.46 (1.07, 1.98) | 0.018   |
|                     | Model 3 | 1 (Ref.)               | 1.19 (0.86, 1.63) | 1.16 (0.86, 1.62) | 1.44 (1.07, 1.94) | 0.021   |
| Ischemic stroke     | Cases/N | 42/4097                | 69/4027           | 83/3979           | 129/4010          |         |
|                     | Model 1 | 1 (Ref.)               | 1.68 (1.15, 2.47) | 2.05 (1.41, 2.96) | 3.17 (2.24, 4.49) | <0.001  |
|                     | Model 2 | 1 (Ref.)               | 1.27 (0.87, 1.87) | 1.19 (0.82, 1.73) | 1.58 (1.11, 2.25) | 0.013   |
|                     | Model 3 | 1 (Ref.)               | 1.25 (0.91, 1.86) | 1.17 (0.81, 1.70) | 1.57 (1.11, 2.21) | 0.016   |
| Non-ischemic stroke | Cases/N | 15/4097                | 20/4027           | 27/3979           | 32/4010           |         |
|                     | Model 1 | 1 (Ref.)               | 1.36 (0.70, 2.66) | 1.86 (0.99, 3.50) | 2.20 (1.19, 4.07) | 0.006   |
|                     | Model 2 | 1 (Ref.)               | 1.04 (0.53, 2.04) | 1.13 (0.60, 2.14) | 1.11 (0.59, 2.07) | 0.713   |
|                     | Model 3 | 1 (Ref.)               | 1.10 (0.57, 2.14) | 1.12 (0.64, 2.24) | 1.07 (0.57, 1.99) | 0.844   |

Model 1: unadjusted model; Model 2: adjusted for age, sex and BMI; Model 3: further adjusted for HDL-C, TC, TG, LDL-C, eGFR, hypertension, smoking status, use of statins and family history of stroke.



**Table 3.** Hazard ratios (95% CI) for incident stroke by clinical classifications of FBG levels

|                   |                |            | Model 1           | Model 2           | Model 3           |
|-------------------|----------------|------------|-------------------|-------------------|-------------------|
| ADA<br>definition | <5.6 mmol/L    | Cases/N    |                   | 220/11079         |                   |
|                   |                | HR (95%CI) | 1 (Ref.)          | 1 (Ref.)          | 1 (Ref.)          |
|                   | 5.6–6.9 mmol/L | Cases/N    |                   | 136/3869          |                   |
|                   |                | HR (95%CI) | 1.78 (1.43, 2.20) | 1.16 (0.94, 1.44) | 1.17 (0.93, 1.42) |
|                   | ≥7.0 mmol/L    | Cases/N    |                   | 61/1165           |                   |
|                   |                | HR (95%CI) | 2.69 (2.02, 3.57) | 1.72 (1.29, 2.28) | 1.68 (1.24, 2.27) |
| P trend           |                |            | <0.001            | 0.001             | 0.001             |
| WHO<br>definition | <6.1 mmol/L    | Cases/N    |                   | 301/13422         |                   |
|                   |                | HR (95%CI) | 1 (Ref.)          | 1 (Ref.)          | 1 (Ref.)          |
|                   | 6.1–6.9 mmol/L | Cases/N    |                   | 55/1526           |                   |
|                   |                | HR (95%CI) | 1.61 (1.21, 2.15) | 1.08 (0.81, 1.45) | 1.11 (0.83, 1.47) |
|                   | ≥7.0 mmol/L    | Cases/N    |                   | 61/1165           |                   |
|                   |                | HR (95%CI) | 2.38 (1.81, 3.03) | 1.64 (1.24, 2.17) | 1.62 (1.21, 2.13) |
| P trend           |                |            | <0.001            | 0.001             | 0.002             |

ADA: American Diabetes Association; WHO: World Health Organization.

Model 1: unadjusted model; Model 2: adjusted for age, sex and BMI; Model 3: further adjusted for HDL-C, TC, TG, LDL-C, eGFR, hypertension, smoking status, use of statins and family history of stroke.

**Table 4.** Hazard ratios (95% CI) for incident stroke by sex

|       |         | Quartile of FBG Levels |                   |                   |                   | P trend |
|-------|---------|------------------------|-------------------|-------------------|-------------------|---------|
|       |         | Q1                     | Q2                | Q3                | Q4                |         |
|       |         | HR (95% CI)            | HR (95% CI)       | HR (95% CI)       | HR (95% CI)       |         |
|       | Cases/N | 33/1725                | 42/1586           | 53/1599           | 64/1688           |         |
| Men   | Model 1 | 1 (Ref.)               | 1.40 (0.89, 2.20) | 1.74 (1.13, 2.69) | 1.99 (1.31, 3.03) | 0.001   |
|       | Model 2 | 1 (Ref.)               | 1.04 (0.66, 1.64) | 1.16 (0.75, 1.80) | 1.11 (0.73, 1.71) | 0.560   |
|       | Model 3 | 1 (Ref.)               | 1.05 (0.68, 1.69) | 1.15 (0.74, 1.78) | 1.04 (0.65, 1.62) | 0.741   |
|       | Cases/N | 24/2372                | 47/2441           | 57/2380           | 97/2322           |         |
| Women | Model 1 | 1 (Ref.)               | 1.91 (1.21, 3.29) | 2.38 (1.48, 3.84) | 4.19 (2.68, 6.55) | <0.001  |
|       | Model 2 | 1 (Ref.)               | 1.45 (0.89, 2.37) | 1.25 (0.78, 2.03) | 1.90 (1.21, 2.99) | 0.006   |
|       | Model 3 | 1 (Ref.)               | 1.43 (0.87, 2.33) | 1.30 (0.80, 2.09) | 1.92 (1.22, 3.01) | 0.004   |

Model 1: unadjusted model; Model 2: adjusted for age, sex and BMI; Model 3: further adjusted for HDL-C, TC, TG, LDL-C, eGFR, hypertension, smoking status, use of statins and family history of stroke.

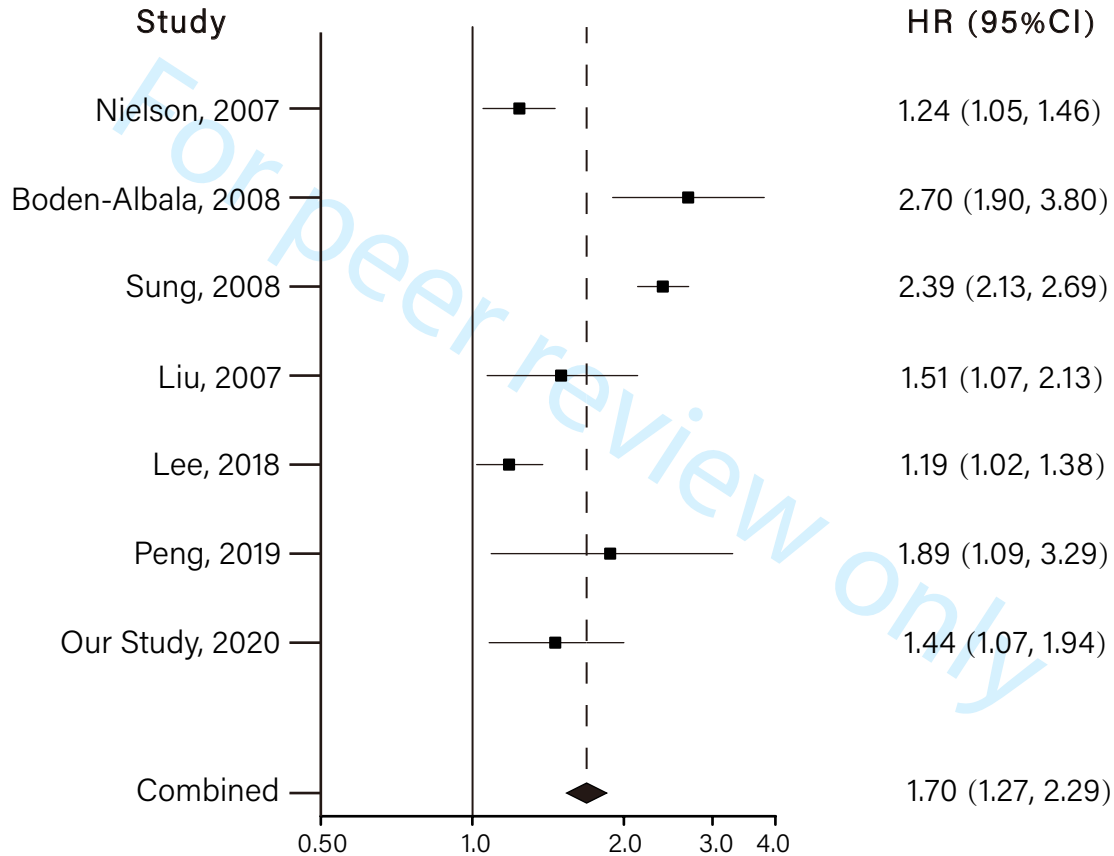

# Appendix S1. Flow chart

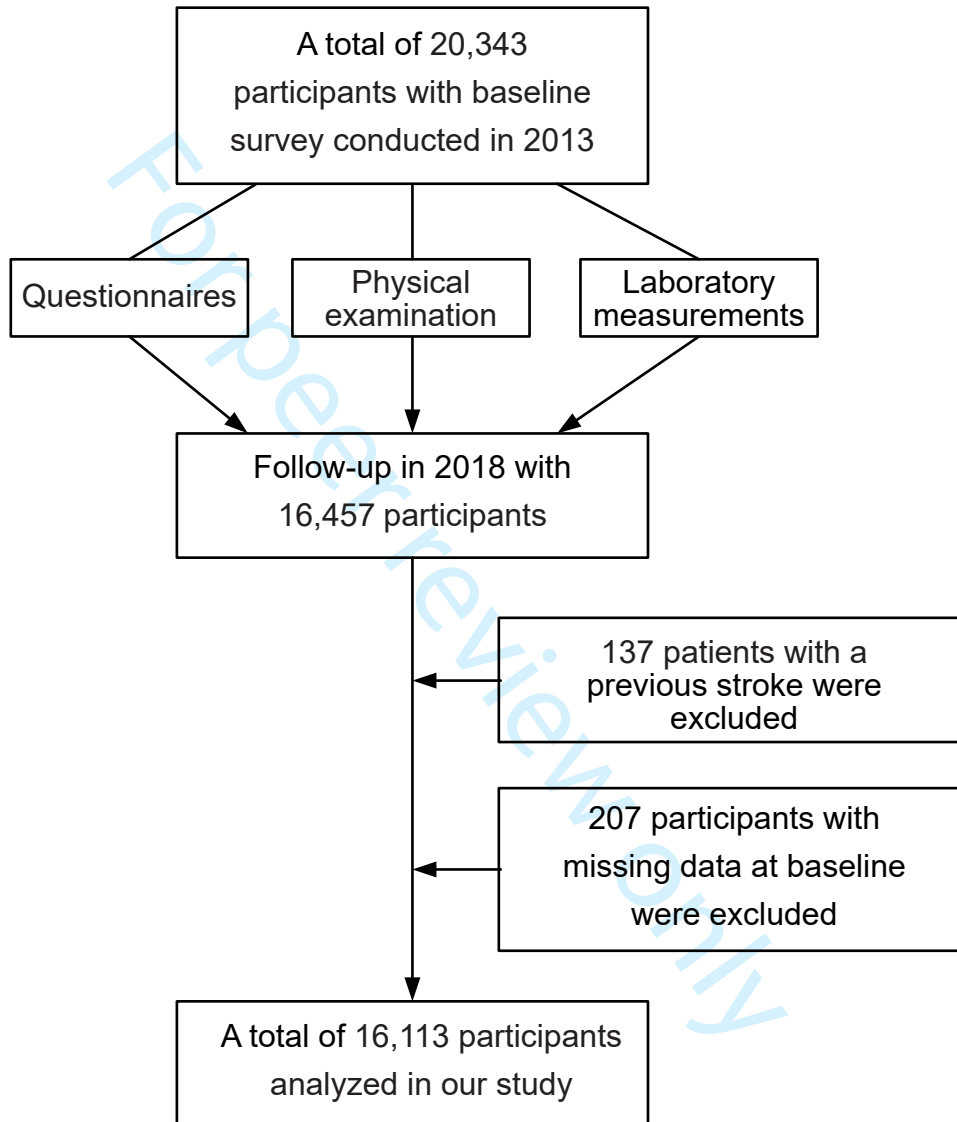

**Appendix S2.** Hazard ratios (95% CI) for incident stroke by menopausal status in women

|                                   |    |                    | Model 1            | Model 2            | Model 3            |
|-----------------------------------|----|--------------------|--------------------|--------------------|--------------------|
| Premenopausal                     | Q1 | Cases/N            |                    | 1/906              |                    |
|                                   |    | HR (95%CI)         | 1 (Ref.)           | 1 (Ref.)           | 1 (Ref.)           |
|                                   | Q2 | Cases/N            |                    | 5/896              |                    |
|                                   |    | HR (95%CI)         | 5.07 (0.59, 43.37) | 2.97 (0.34, 25.86) | 2.54 (0.29, 22.48) |
|                                   | Q3 | Cases/N            |                    | 7/883              |                    |
|                                   |    | HR (95%CI)         | 7.19 (0.89, 58.44) | 3.88 (0.47, 31.97) | 3.86 (0.47, 31.78) |
|                                   | Q4 | Cases/N            |                    | 8/884              |                    |
| HR (95%CI)                        |    | 8.18 (0.29, 22.48) | 1.90 (0.22, 16.15) | 1.80 (0.21, 15.30) |                    |
| P trend                           |    |                    | 0.013              | 0.850              | 0.916              |
| Postmenopausal or<br>oophorectomy | Q1 | Cases/N            |                    | 35/1489            |                    |
|                                   |    | HR (95%CI)         | 1 (Ref.)           | 1 (Ref.)           | 1 (Ref.)           |
|                                   | Q2 | Cases/N            |                    | 42/1513            |                    |
|                                   |    | HR (95%CI)         | 1.18 (0.76, 1.85)  | 1.05 (0.67, 1.64)  | 1.06 (0.62, 1.79)  |
|                                   | Q3 | Cases/N            |                    | 49/1473            |                    |
|                                   |    | HR (95%CI)         | 1.42 (0.92, 2.19)  | 1.07 (0.69, 1.66)  | 1.14 (0.70, 1.87)  |
|                                   | Q4 | Cases/N            |                    | 78/1471            |                    |
| HR (95%CI)                        |    | 2.28 (1.53, 3.40)  | 1.66 (1.11, 2.28)  | 1.68 (1.06, 2.68)  |                    |
| P trend                           |    |                    | <0.001             | 0.006              | 0.006              |

Model 1: unadjusted model; Model 2: Adjusted for age and BMI; Model 3: further adjusted for HDL-C, TC, TG, LDL-C, eGFR, hypertension, use of statins and family history of stroke.

STROBE Statement—Checklist of items that should be included in reports of *cohort studies*

|                           | Item No | Recommendation                                                                                                                                                                       | Page No | Relevant text from manuscript |
|---------------------------|---------|--------------------------------------------------------------------------------------------------------------------------------------------------------------------------------------|---------|-------------------------------|
| <b>Title and abstract</b> | 1       | (a) Indicate the study's design with a commonly used term in the title or the abstract                                                                                               | 2       | Design                        |
|                           |         | (b) Provide in the abstract an informative and balanced summary of what was done and what was found                                                                                  | 2       | Results                       |
| <b>Introduction</b>       |         |                                                                                                                                                                                      |         |                               |
| Background/rationale      | 2       | Explain the scientific background and rationale for the investigation being reported                                                                                                 | 5-6     |                               |
| Objectives                | 3       | State specific objectives, including any prespecified hypotheses                                                                                                                     | 5       |                               |
| <b>Methods</b>            |         |                                                                                                                                                                                      |         |                               |
| Study design              | 4       | Present key elements of study design early in the paper                                                                                                                              | 7       | Study population              |
| Setting                   | 5       | Describe the setting, locations, and relevant dates, including periods of recruitment, exposure, follow-up, and data collection                                                      | 7-8     |                               |
| Participants              | 6       | (a) Give the eligibility criteria, and the sources and methods of selection of participants. Describe methods of follow-up                                                           | 7       | Study population              |
|                           |         | (b) For matched studies, give matching criteria and number of exposed and unexposed                                                                                                  | 7       | Study population              |
| Variables                 | 7       | Clearly define all outcomes, exposures, predictors, potential confounders, and effect modifiers. Give diagnostic criteria, if applicable                                             | 7-8     |                               |
| Data sources/measurement  | 8*      | For each variable of interest, give sources of data and details of methods of assessment (measurement). Describe comparability of assessment methods if there is more than one group | 7-8     |                               |
| Bias                      | 9       | Describe any efforts to address potential sources of bias                                                                                                                            | 7       | Study population              |
| Study size                | 10      | Explain how the study size was arrived at                                                                                                                                            | 7       | Study population              |
| Quantitative variables    | 11      | Explain how quantitative variables were handled in the analyses. If applicable, describe which groupings were chosen and why                                                         | 7-8     |                               |
| Statistical methods       | 12      | (a) Describe all statistical methods, including those used to control for confounding                                                                                                | 8-9     | Statistical analysis          |
|                           |         | (b) Describe any methods used to examine subgroups and interactions                                                                                                                  | 8-9     | Statistical analysis          |
|                           |         | (c) Explain how missing data were addressed                                                                                                                                          | 8-9     | Statistical analysis          |
|                           |         | (d) If applicable, explain how loss to follow-up was addressed                                                                                                                       | 8-9     | Statistical analysis          |
|                           |         | (e) Describe any sensitivity analyses                                                                                                                                                | 8-9     | Statistical analysis          |

| <b>Results</b>           |     |                                                                                                                                                                                                              |       |                                         |
|--------------------------|-----|--------------------------------------------------------------------------------------------------------------------------------------------------------------------------------------------------------------|-------|-----------------------------------------|
| Participants             | 13* | (a) Report numbers of individuals at each stage of study—eg numbers potentially eligible, examined for eligibility, confirmed eligible, included in the study, completing follow-up, and analysed            | 11    | Characteristics of the study population |
|                          |     | (b) Give reasons for non-participation at each stage                                                                                                                                                         | 11    | Characteristics of the study population |
|                          |     | (c) Consider use of a flow diagram                                                                                                                                                                           |       | supplemental appendix S1                |
| Descriptive data         | 14* | (a) Give characteristics of study participants (eg demographic, clinical, social) and information on exposures and potential confounders                                                                     | 11    | tables                                  |
|                          |     | (b) Indicate number of participants with missing data for each variable of interest                                                                                                                          | 11    | Characteristics of the study population |
|                          |     | (c) Summarise follow-up time (eg, average and total amount)                                                                                                                                                  | 11    | tables                                  |
| Outcome data             | 15* | Report numbers of outcome events or summary measures over time                                                                                                                                               | 11    | tables                                  |
| Main results             | 16  | (a) Give unadjusted estimates and, if applicable, confounder-adjusted estimates and their precision (eg, 95% confidence interval). Make clear which confounders were adjusted for and why they were included | 11-12 | tables and figures                      |
|                          |     | (b) Report category boundaries when continuous variables were categorized                                                                                                                                    | 11-12 | tables and figures                      |
|                          |     | (c) If relevant, consider translating estimates of relative risk into absolute risk for a meaningful time period                                                                                             | 11-12 | tables and figures                      |
| Other analyses           | 17  | Report other analyses done—eg analyses of subgroups and interactions, and sensitivity analyses                                                                                                               | 12    | Meta-analysis                           |
| <b>Discussion</b>        |     |                                                                                                                                                                                                              |       |                                         |
| Key results              | 18  | Summarise key results with reference to study objectives                                                                                                                                                     | 13    | Principal findings                      |
| Limitations              | 19  | Discuss limitations of the study, taking into account sources of potential bias or imprecision. Discuss both direction and magnitude of any potential bias                                                   | 15-16 | Strengths and Limitations               |
| Interpretation           | 20  | Give a cautious overall interpretation of results considering objectives, limitations, multiplicity of analyses, results from similar studies, and other relevant evidence                                   | 15    | Possible mechanisms                     |
| Generalisability         | 21  | Discuss the generalisability (external validity) of the study results                                                                                                                                        | 13-14 |                                         |
| <b>Other information</b> |     |                                                                                                                                                                                                              |       |                                         |
| Funding                  | 22  | Give the source of funding and the role of the funders for the present study and, if                                                                                                                         | 18    | Funding                                 |

---

applicable, for the original study on which the  
present article is based

---

\*Give information separately for exposed and unexposed groups.

**Note:** An Explanation and Elaboration article discusses each checklist item and gives methodological background and published examples of transparent reporting. The STROBE checklist is best used in conjunction with this article (freely available on the Web sites of PLoS Medicine at <http://www.plosmedicine.org/>, Annals of Internal Medicine at <http://www.annals.org/>, and Epidemiology at <http://www.epidem.com/>). Information on the STROBE Initiative is available at <http://www.strobe-statement.org>.

For peer review only
