# Supplementary material for: Association between fasting blood glucose levels and stroke events: a large-scale community-based cohort study from China
Source: PubMed Central journal article supplement — BMJ Open. 2021 Aug 18;11(8):e050234. doi: 10.1136/bmjopen-2021-050234 (PMC8375728; doi:10.1136/bmjopen-2021-050234), 2021-08-18
Supplement: bmjopen-2021-050234supp002.pdf [file bmjopen-2021-050234supp002.pdf]

**Appendix S2.** Hazard ratios (95% CI) for incident stroke by menopausal status in women

|               |                                |            | Model 1            | Model 2            | Model 3            |       |
|---------------|--------------------------------|------------|--------------------|--------------------|--------------------|-------|
| Premenopausal | Q1                             | Cases/N    |                    | 1/906              |                    |       |
|               |                                | HR (95%CI) | 1 (Ref.)           | 1 (Ref.)           | 1 (Ref.)           |       |
|               | Q2                             | Cases/N    |                    | 5/896              |                    |       |
|               |                                | HR (95%CI) | 5.07 (0.59, 43.37) | 2.97 (0.34, 25.86) | 2.54 (0.29, 22.48) |       |
|               | Q3                             | Cases/N    |                    | 7/883              |                    |       |
|               |                                | HR (95%CI) | 7.19 (0.89, 58.44) | 3.88 (0.47, 31.97) | 3.86 (0.47, 31.78) |       |
|               | Q4                             | Cases/N    |                    | 8/884              |                    |       |
|               |                                | HR (95%CI) | 8.18 (0.29, 22.48) | 1.90 (0.22, 16.15) | 1.80 (0.21, 15.30) |       |
|               | P trend                        |            |                    | 0.013              | 0.850              | 0.916 |
|               | Postmenopausal or oophorectomy | Q1         | Cases/N            |                    | 35/1489            |       |
| HR (95%CI)    |                                |            | 1 (Ref.)           | 1 (Ref.)           | 1 (Ref.)           |       |
| Q2            |                                | Cases/N    |                    | 42/1513            |                    |       |
|               |                                | HR (95%CI) | 1.18 (0.76, 1.85)  | 1.05 (0.67, 1.64)  | 1.06 (0.62, 1.79)  |       |
| Q3            |                                | Cases/N    |                    | 49/1473            |                    |       |
|               |                                | HR (95%CI) | 1.42 (0.92, 2.19)  | 1.07 (0.69, 1.66)  | 1.14 (0.70, 1.87)  |       |
| Q4            |                                | Cases/N    |                    | 78/1471            |                    |       |
|               |                                | HR (95%CI) | 2.28 (1.53, 3.40)  | 1.66 (1.11, 2.28)  | 1.68 (1.06, 2.68)  |       |
| P trend       |                                |            | <0.001             | 0.006              | 0.006              |       |

Model 1: unadjusted model; Model 2: Adjusted for age and BMI; Model 3: further adjusted for HDL-C, TC, TG, LDL-C, eGFR, hypertension, use of statins and family history of stroke.
