# Supplementary figures and images for: Association between fasting blood glucose levels and stroke events: a large-scale community-based cohort study from China
Source: PubMed Central journal article supplement — BMJ Open. 2021 Aug 18;11(8):e050234. doi: 10.1136/bmjopen-2021-050234 (PMC8375728; doi:10.1136/bmjopen-2021-050234), 2021-08-18

## Appendix S1. Flow chart

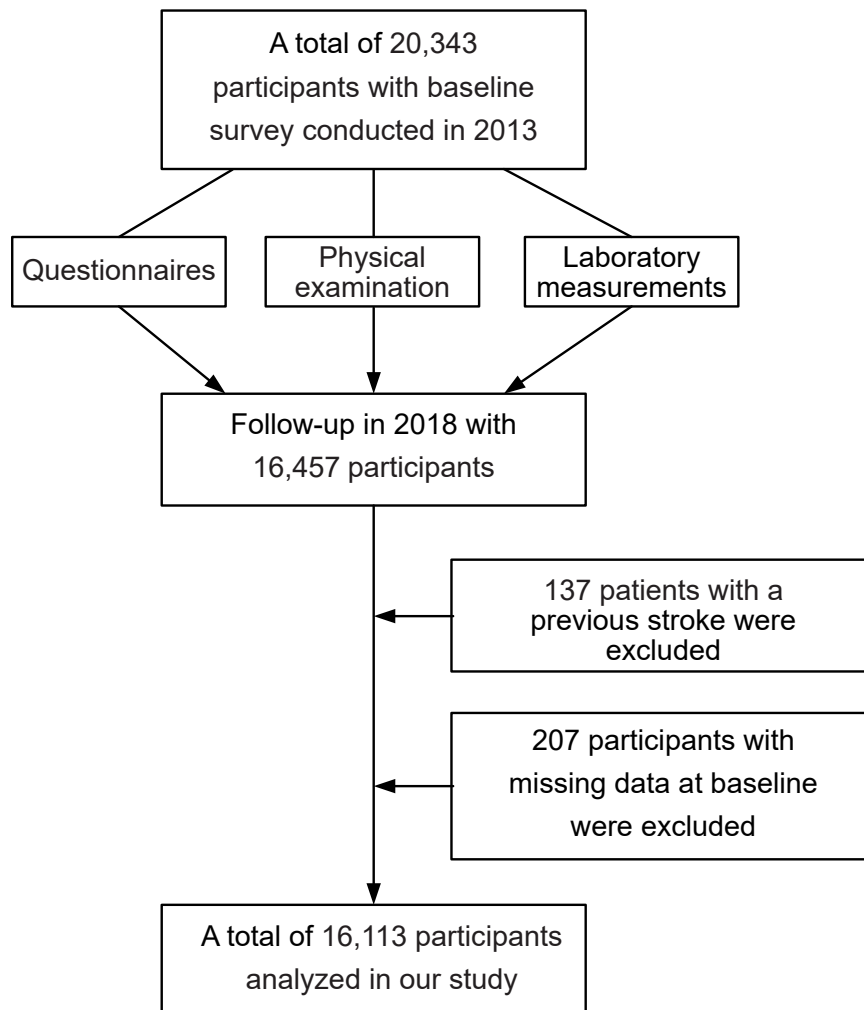

Supplement: bmjopen-2021-050234supp001.pdf [file bmjopen-2021-050234supp001.pdf]
